# Supplementary material for: Revisiting the contribution of land transport and shipping emissions to tropospheric ozone
Source: Copernicus journal article supplement (doi:10.5194/acp-18-5567-2018), 2018-04-24
Supplement: Supplementary file 1 [file acp-18-5567-2018-supplement.zip]

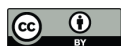

## *Supplement of*

# **Revisiting the contribution of land transport and shipping emissions to tropospheric ozone**

**Mariano Mertens et al.**

*Correspondence to:* Mariano Mertens ([mariano.mertens@dlr.de](mailto:mariano.mertens@dlr.de))

- [acp-18-5567-2018-supplement-title-page.pdf](#)
- [data](#)
  - [850pc\\_of\\_contribution\\_and\\_impact.nc](#)
  - [O3\\_contribution\\_july\\_average.nc](#)
  - [O3\\_impacts\\_july\\_average.nc](#)
  - [RF\\_O3\\_vertical\\_profile.nc](#)
  - [RF\\_O3\\_zonal\\_mean.nc](#)
  - [description.txt](#)
  - [nox\\_emissions\\_tra\\_shp.nc](#)
  - [ozone\\_budget\\_data\\_land\\_transport.txt](#)
  - [ozone\\_budget\\_data\\_ship.txt](#)
  - [scatter\\_nox.nc](#)
  - [seasonal\\_O3\\_contributions.nc](#)
- [meccanism.pdf](#)
- [supplement.pdf](#)

The copyright of individual parts of the supplement might differ from the CC BY 4.0 License.
