# Supplementary material for: Revisiting the contribution of land transport and shipping emissions to tropospheric ozone
Source: Copernicus journal article supplement (doi:10.5194/acp-18-5567-2018), 2018-04-24
Supplement: Supplementary file 3 [file acp-18-5567-2018-supplement.zip]

Archive with 15 entries (14 files):
- data/
- data/scatter_nox.nc
- data/description.txt
- data/850pc_of_contribution_and_impact.nc
- data/seasonal_O3_contributions.nc
- data/ozone_budget_data_land_transport.txt
- data/O3_contribution_july_average.nc
- data/RF_O3_zonal_mean.nc
- data/nox_emissions_tra_shp.nc
- data/O3_impacts_july_average.nc
- data/ozone_budget_data_ship.txt
- data/RF_O3_vertical_profile.nc
- acp-18-5567-2018-supplement-title-page.pdf
- supplement.pdf
- meccanism.pdf
