# Supplementary material for: Revisiting the contribution of land transport and shipping emissions to tropospheric ozone
Source: Copernicus journal article supplement (doi:10.5194/acp-18-5567-2018), 2018-04-24
Supplement: Supplementary file 3 [file acp-18-5567-2018-supplement.zip › data/description.txt]

In this folder you can find the data used for the study as netcdf-Files. For full model data please contact the author (mariano.mertens@dlr.de).

The folder contains the following files and data:

++++++
nox_emissions_tra_shp.nc 
++++++
Average NOx emissions of land transport and shipping as shown in Fig.1.
Units of all variable are kg (n) m-2 s-1

nox_mean_land_transport - mean land transport emissions
nox_mean_ship - mean shipping emissions 

++++++
seasonal_O3_contributions.nc
++++++
Seasonal average contributions as shown in Fig. 2 and 3. 
Units of all variable are mol/mol. 

O3tra_ave_djfc - O3tra averaged for DJF
O3tra_ave_jjac - O3tra averaged for JJA
O3shp_ave_djfc - O3shp averaged for DJF
O3shp_ave_jjac - O3shp averaged for JJA
O3_ave_djfc - Ozone averaged for DJF
O3_ave_jjac - Ozone averaged for JJA

++++++
O3_contribution_july_average.nc
++++++
As seasonal_O3_contributions.nc but only averaged for July. 

O3_ave_jac    - July average ozone
O3tra_ave_jac - July average O3tra
O3shp_ave_jac - July average O3shp

++++++
O3_impacts_july_average.nc
++++++
Average impcats (absolute and relative) as estimated by the 5% perturbation averaged for July. All values scaled by 20. 

O3_abs_impact_shp - July averaged absolute shipping impact (mol/mol)
O3_abs_impact_tra - July averaged absolute land transport impact (mol/mol)
O3_rel_impact_shp - July averaged relative shipping impact (%)
O3_rel_impact_tra - July averaged relative land transport impact (%) 

++++++
850pc_of_contribution_and_impact.nc
++++++
Impact and contribution of land transport emissions on/to the 850PC (Fig.4) 

rel_difference  - relative difference between impact and contribution (Fig 4c, in %) 
do3    - Impact of land transport emissions on the 850PC (in DU)
o3tra  - Contribution of land transport emissions to the 850PC (in DU)

++++++
scatter_nox.nc
++++++
Average NOx mixing ratios (pmol/mol) and net ozone production (PO3 in pmol/mol/s) as shown in Fig. 5. 

global_nox - global monthly mean values of NOx 
global_po3 - global monthly mean values of PO3 
europe_nox - Europe May - August monthly mean values of NOx 
europe_po3 - Europe May - August monthly mean values of PO3 
sea_nox - South-east Asia May - August monthly mean values of NOx 
sea_po3 - South-east Asia  May - August monthly mean values of PO3 
south_america_nox -  South America  November  -  February  monthly mean values of NOx 
south_america_po3 - South America  November - February monthly mean values of NOx  
north_africa_nox - North Africa  May - August monthly mean values of NOx 
north_africa_po3 - North Africa  May - August monthly mean values of PO3 


++++++
RF_O3_zonal_mean.nc
++++++
Zonal averaged radiative fluxes (W/m**2) as shown in Fig. 9 

flxn_tra_tag - net flux land transport tagging method
flxt_tra_tag - longwave flux land transport tagging method
flxs_tra_tag - shortwave flux land transport tagging method
flxn_tra_per - net flux land transport perturbation method 
flxt_tra_per - longwave flux land transport perturbation method
flxs_tra_per -  shortwave flux land transport perturbation method
flxn_shp_tag - net flux shipping tagging method
flxt_shp_tag - longwave flux shipping tagging method
flxs_shp_tag - shortwave flux shipping tagging method
flxn_shp_per - net flux shipping perturbation method 
flxt_shp_per - longwave flux shipping perturbation method
flxs_shp_per - shortwave flux shipping perturbation method


++++++
RF_O3_zonal_mean.nc
++++++
Vertical profiles of radiative fluxes (W/m**2) as shown in Fig. 10 

flxn_tra_tag - net flux land transport tagging method
flxt_tra_tag - longwave flux land transport tagging method
flxs_tra_tag - shortwave flux land transport tagging method
flxn_tra_per - net flux land transport perturbation method 
flxt_tra_per - longwave flux land transport perturbation method
flxs_tra_per -  shortwave flux land transport perturbation method
flxn_shp_tag - net flux shipping tagging method
flxt_shp_tag - longwave flux shipping tagging method
flxs_shp_tag - shortwave flux shipping tagging method
flxn_shp_per - net flux shipping perturbation method 
flxt_shp_per - longwave flux shipping perturbation method
flxs_shp_per - shortwave flux shipping perturbation method


++++++
ozone_budget_data_land_transport.txt
++++++

Ozone budgets shown in Fig. 7.  


++++++
ozone_budget_data_ship.txt
++++++

Ozone budgets shown in Fig. 8. 
