# Supplementary material for: Revisiting the contribution of land transport and shipping emissions to tropospheric ozone
Source: Copernicus journal article supplement (doi:10.5194/acp-18-5567-2018), 2018-04-24
Supplement: Supplementary file 3 [file acp-18-5567-2018-supplement.zip › data/ozone_budget_data_land_transport.txt]

global 

Sector          Production (Tg a-1)     Loss (Tg a-1)   net Production (Tg a-1) 
land trnsport   481                     316             165    
other anthropo. 1434                    942             492
rest            3359                    2714            644    

Europe

Sector          Production (Tg a-1)     Loss (Tg a-1)   net Production (Tg a-1) 
land trnsport   36                      12              24    
other anthropo. 91                      31              60
rest            99                      54              45    

North America

Sector          Production (Tg a-1)     Loss (Tg a-1)   net Production (Tg a-1) 
land trnsport   70                      31              39    
other anthropo. 157                     382             74
rest            232                     -160            73

South-east Asia

Sector          Production (Tg a-1)     Loss (Tg a-1)   net Production (Tg a-1) 
land trnsport   83                      31              52    
other anthropo. 310                     145             165
rest            335                     -240            94

    
