# Supplementary material for: Revisiting the contribution of land transport and shipping emissions to tropospheric ozone
Source: Copernicus journal article supplement (doi:10.5194/acp-18-5567-2018), 2018-04-24
Supplement: Supplementary file 3 [file acp-18-5567-2018-supplement.zip › data/ozone_budget_data_ship.txt]

global 

Sector          Production (Tg a-1)     Loss (Tg a-1)   net Production (Tg a-1) 
shipping        364                     235             129    
other anthropo. 1552                    1023            528
rest            3359                    2714            644    


North Atlantic Ocean

Sector          Production (Tg a-1)     Loss (Tg a-1)   net Production (Tg a-1) 
shipping        52                      25              26    
other anthropo. 124                     92              33
rest            187                     169             18    


Indian Ocean

Sector          Production (Tg a-1)     Loss (Tg a-1)   net Production (Tg a-1) 
shipping        51                      34              17    
other anthropo. 187                     144             43
rest            394                     366             28    


North Pacific Ocean

Sector          Production (Tg a-1)     Loss (Tg a-1)   net Production (Tg a-1) 
shipping        74                      37              36    
other anthropo. 163                     139             24
rest            255                     246             9    
