# Supplementary material for: Revisiting the contribution of land transport and shipping emissions to tropospheric ozone
Source: Copernicus journal article supplement (doi:10.5194/acp-18-5567-2018), 2018-04-24
Supplement: Supplementary file 3 [file acp-18-5567-2018-supplement.zip › meccanism.pdf]

# The Chemical Mechanism of MECCA

KPP version: 2.2.1\_rs5

MECCA version: 3.7f

Date: March 23, 2018.

Selected reactions:

“(((Tr && (G || Het) && !I) || St) && !Hg)”

Number of aerosol phases: 0

Number of species in selected mechanism:

Gas phase: 164

Aqueous phase: 0

All species: 164

Number of reactions in selected mechanism:

Gas phase (Gnn): 218

Aqueous phase (Annn): 0

Henry (Hnn): 0

Photolysis (Jnn): 68

Aqueous phase photolysis (PHnnn): 0

Heterogeneous (HETnnn): 12

Equilibria (EQnn): 0

Isotope exchange (DGnnn): 0

Dummy (Dnn): 0

All equations: 298

This document is part of the electronic supplement to our article  
‘Revisiting the contribution of land transport and shipping emissions  
to tropospheric ozone’

in Atmos. Chem. Phys. (2018), available at:

<https://www.atmos-chem-phys.net/>

Table 1: Gas phase reactions

| #      | labels   | reaction                                                                                                                                  | rate coefficient                                       | reference                                             |
|--------|----------|-------------------------------------------------------------------------------------------------------------------------------------------|--------------------------------------------------------|-------------------------------------------------------|
| G1000  | UpStTrG  | $O_2 + O(^1D) \rightarrow O(^3P) + O_2$                                                                                                   | $3.3E-11*EXP(55./temp)$                                | Sander et al. (2011)                                  |
| G1001  | UpStTrG  | $O_2 + O(^3P) \rightarrow O_3$                                                                                                            | $6.E-34*((temp/300.)**(-2.4))*cair$                    | Sander et al. (2011)                                  |
| G1002a | UpStG    | $O_3 + O(^1D) \rightarrow 2.0 \text{ o3lossxo} + 2.0 \text{ LossO3O} + 2. \text{ LossO3} + 2 O_2$                                         | $1.2E-10$                                              | Sander et al. (2011)*                                 |
| G1003  | UpStG    | $O_3 + O(^3P) \rightarrow 2.0 \text{ LossO3O} + 2. \text{ LossO3} + 2 O_2$                                                                | $8.E-12*EXP(-2060./temp)$                              | Sander et al. (2011)                                  |
| G2100  | UpStTrG  | $H + O_2 \rightarrow HO_2$                                                                                                                | $k\_3rd(temp, cair, 4.4E-32, 1.3, 7.5E-11, -0.2, 0.6)$ | Sander et al. (2011)                                  |
| G2101  | UpStG    | $H + O_3 \rightarrow 1.0 \text{ o3lossxo} + \text{LossO3H} + 1. \text{ LossO3} + OH + O_2$                                                | $1.4E-10*EXP(-470./temp)$                              | Sander et al. (2011)                                  |
| G2102  | UpStG    | $H_2 + O(^1D) \rightarrow 1.0 \text{ o3lossxo} + \text{LossO3H} + 1. \text{ LossO3} + H + OH$                                             | $1.2E-10$                                              | Sander et al. (2011)                                  |
| G2103  | UpStG    | $OH + O(^3P) \rightarrow \text{LossO3H} + 1. \text{ LossO3} + H + O_2$                                                                    | $1.8E-11*EXP(180./temp)$                               | Sander et al. (2011)                                  |
| G2104  | UpStTrG  | $OH + O_3 \rightarrow 1.0 \text{ o3lossoh} + 1.0 \text{ LossG2104} + \text{LossO3H} + \text{LossOH} + 1. \text{ LossO3} + HO_2 + O_2$     | $1.7E-12*EXP(-940./temp)$                              | Sander et al. (2011)                                  |
| G2105  | UpStTrG  | $OH + H_2 \rightarrow H_2O + H$                                                                                                           | $2.8E-12*EXP(-1800./temp)$                             | Sander et al. (2011)                                  |
| G2106  | UpStG    | $HO_2 + O(^3P) \rightarrow 1.0 \text{ LossG2106} + \text{LossO3H} + 1. \text{ LossO3} + OH + O_2$                                         | $3.E-11*EXP(200./temp)$                                | Sander et al. (2011)                                  |
| G2107  | UpStTrG  | $HO_2 + O_3 \rightarrow 1.0 \text{ o3lossho2} + 1.0 \text{ LossG2107} + \text{LossO3H} + \text{LossHO2} + 1. \text{ LossO3} + OH + 2 O_2$ | $1.E-14*EXP(-490./temp)$                               | Sander et al. (2011)                                  |
| G2108a | UpStG    | $HO_2 + H \rightarrow 2 OH$                                                                                                               | $7.2E-11$                                              | Sander et al. (2011)                                  |
| G2108b | UpStG    | $HO_2 + H \rightarrow H_2 + O_2$                                                                                                          | $6.9E-12$                                              | Sander et al. (2011)                                  |
| G2108c | UpStG    | $HO_2 + H \rightarrow \text{LossO3Hn} + 1. \text{ ProdO3} + O(^3P) + H_2O$                                                                | $1.6E-12$                                              | Sander et al. (2011)                                  |
| G2109  | UpStTrG  | $HO_2 + OH \rightarrow \text{lossho2oh} + H_2O + O_2$                                                                                     | $4.8E-11*EXP(250./temp)$                               | Sander et al. (2011)                                  |
| G2110  | UpStTrG  | $HO_2 + HO_2 \rightarrow \text{ho2lossHO2} + 1.0 \text{ LossG2110} + H_2O_2 + O_2$                                                        | $k\_H02\_H02$                                          | Christensen et al. (2002), Kircher and Sander (1984)* |
| G2111  | UpStTrG  | $H_2O + O(^1D) \rightarrow 1.0 \text{ o3lossxo} + \text{LossO3O} + \text{LossO1D} + 1. \text{ LossO3} + 2 OH$                             | $1.63E-10*EXP(60./temp)$                               | Sander et al. (2011)                                  |
| G2112  | UpStTrG  | $H_2O_2 + OH \rightarrow H_2O + HO_2$                                                                                                     | $1.8E-12$                                              | Sander et al. (2011)                                  |
| G3100  | UpStGN   | $N + O_2 \rightarrow \text{LossO3Nn} + 1. \text{ ProdO3} + NO + O(^3P)$                                                                   | $1.5E-11*EXP(-3600./temp)$                             | Sander et al. (2011)                                  |
| G3101  | UpStTrGN | $N_2 + O(^1D) \rightarrow O(^3P) + N_2$                                                                                                   | $2.15E-11*EXP(110./temp)$                              | Sander et al. (2011)                                  |
| G3102a | UpStGN   | $N_2O + O(^1D) \rightarrow 1.0 \text{ o3lossxo} + \text{noprodN2O} + \text{LossO3O} + 1. \text{ LossO3} + 2 NO$                           | $7.25E-11*EXP(20./temp)$                               | Sander et al. (2011)                                  |
| G3102b | StGN     | $N_2O + O(^1D) \rightarrow 1.0 \text{ o3lossxo} + \text{LossO3O} + 1. \text{ LossO3} + N_2 + O_2$                                         | $4.63E-11*EXP(20./temp)$                               | Sander et al. (2011)                                  |

Table 1: Gas phase reactions (... continued)

| #     | labels   | reaction                                                                                                                                                         | rate coefficient                                                                           | reference                 |
|-------|----------|------------------------------------------------------------------------------------------------------------------------------------------------------------------|--------------------------------------------------------------------------------------------|---------------------------|
| G3103 | UpStTrGN | $\text{NO} + \text{O}_3 \rightarrow 1.0 \text{ LossG3103} + \text{NO}_2 + \text{O}_2$                                                                            | $3. \text{E}-12 * \text{EXP}(-1500./\text{temp})$                                          | Sander et al. (2011)      |
| G3104 | UpStGN   | $\text{NO} + \text{N} \rightarrow \text{LossO3Nn} + 1. \text{ ProdO3} + \text{O}(^3\text{P}) + \text{N}_2$                                                       | $2.1 \text{E}-11 * \text{EXP}(100./\text{temp})$                                           | Sander et al. (2011)      |
| G3105 | UpStGN   | $\text{NO}_2 + \text{O}(^3\text{P}) \rightarrow 1.0 \text{ LossG3105} + 2.0 \text{ LossO3N2} + 2.0 \text{ LossO3N} + 2. \text{ LossO3} + \text{NO} + \text{O}_2$ | $5.1 \text{E}-12 * \text{EXP}(210./\text{temp})$                                           | Sander et al. (2011)      |
| G3106 | StTrGN   | $\text{NO}_2 + \text{O}_3 \rightarrow 1.0 \text{ LossG3106} + \text{NO}_3 + \text{O}_2$                                                                          | $1.2 \text{E}-13 * \text{EXP}(-2450./\text{temp})$                                         | Sander et al. (2011)      |
| G3107 | UpStGN   | $\text{NO}_2 + \text{N} \rightarrow \text{N}_2\text{O} + \text{O}(^3\text{P})$                                                                                   | $5.8 \text{E}-12 * \text{EXP}(220./\text{temp})$                                           | Sander et al. (2011)      |
| G3108 | StTrGN   | $\text{NO}_3 + \text{NO} \rightarrow 2 \text{ NO}_2$                                                                                                             | $1.5 \text{E}-11 * \text{EXP}(170./\text{temp})$                                           | Sander et al. (2011)      |
| G3109 | UpStTrGN | $\text{NO}_3 + \text{NO}_2 \rightarrow \text{N}_2\text{O}_5$                                                                                                     | k_N03_N02                                                                                  | Sander et al. (2011)*     |
| G3110 | StTrGN   | $\text{N}_2\text{O}_5 \rightarrow \text{NO}_2 + \text{NO}_3$                                                                                                     | $\text{k\_N03\_N02}/(2.7 \text{E}-27 * \text{EXP}(11000./\text{temp}))$                    | Sander et al. (2011)*     |
| G3200 | TrGN     | $\text{NO} + \text{OH} \rightarrow \text{HONO}$                                                                                                                  | $\text{k\_3rd}(\text{temp}, \text{cair}, 7.0 \text{E}-31, 2.6, 3.6 \text{E}-11, 0.1, 0.6)$ | Sander et al. (2011)      |
| G3201 | UpStTrGN | $\text{NO} + \text{HO}_2 \rightarrow 1.0 \text{ o3prodho2} + 1.0 \text{ LossG3201} + \text{ProdHO2} + 1. \text{ ProdO3} + \text{NO}_2 + \text{OH}$               | $3.3 \text{E}-12 * \text{EXP}(270./\text{temp})$                                           | Sander et al. (2011)      |
| G3202 | UpStTrGN | $\text{NO}_2 + \text{OH} \rightarrow \text{ohlossNO2} + 1.0 \text{ LossG3202} + \text{HNO}_3$                                                                    | $\text{k\_3rd}(\text{temp}, \text{cair}, 1.8 \text{E}-30, 3.0, 2.8 \text{E}-11, 0., 0.6)$  | Sander et al. (2011)      |
| G3203 | StTrGN   | $\text{NO}_2 + \text{HO}_2 \rightarrow \text{HNO}_4$                                                                                                             | k_N02_H02                                                                                  | Sander et al. (2011)*     |
| G3204 | TrGN     | $\text{NO}_3 + \text{HO}_2 \rightarrow 1.0 \text{ o3lossno} + \text{LossO3N} + 1. \text{ LossO3} + \text{NO}_2 + \text{OH} + \text{O}_2$                         | $3.5 \text{E}-12$                                                                          | Sander et al. (2011)      |
| G3205 | TrGN     | $\text{HONO} + \text{OH} \rightarrow 1.0 \text{ o3prodho2} + \text{ohlossNO2} + \text{LossO3Nn} + 1. \text{ ProdO3} + \text{NO}_2 + \text{H}_2\text{O}$          | $1.8 \text{E}-11 * \text{EXP}(-390./\text{temp})$                                          | Sander et al. (2011)      |
| G3206 | StTrGN   | $\text{HNO}_3 + \text{OH} \rightarrow 1.0 \text{ o3prodho2} + \text{ohlossNO2} + \text{LossO3Nn} + 1. \text{ ProdO3} + \text{H}_2\text{O} + \text{NO}_3$         | k_HN03_OH                                                                                  | Sander et al. (2011)*     |
| G3207 | StTrGN   | $\text{HNO}_4 \rightarrow \text{NO}_2 + \text{HO}_2$                                                                                                             | $\text{k\_N02\_H02}/(2.1 \text{E}-27 * \text{EXP}(10900./\text{temp}))$                    | Sander et al. (2011)*     |
| G3208 | StTrGN   | $\text{HNO}_4 + \text{OH} \rightarrow \text{NO}_2 + \text{H}_2\text{O}$                                                                                          | $1.3 \text{E}-12 * \text{EXP}(380./\text{temp})$                                           | Sander et al. (2011)      |
| G3209 | TrGN     | $\text{NH}_3 + \text{OH} \rightarrow \text{NH}_2 + \text{H}_2\text{O}$                                                                                           | $1.7 \text{E}-12 * \text{EXP}(-710./\text{temp})$                                          | Kohlmann and Poppe (1999) |
| G3210 | TrGN     | $\text{NH}_2 + \text{O}_3 \rightarrow 1. \text{ LossO3} + \text{NH}_2\text{O} + \text{O}_2$                                                                      | $4.3 \text{E}-12 * \text{EXP}(-930./\text{temp})$                                          | Kohlmann and Poppe (1999) |
| G3211 | TrGN     | $\text{NH}_2 + \text{HO}_2 \rightarrow \text{NH}_2\text{O} + \text{OH}$                                                                                          | $4.8 \text{E}-07 * \text{EXP}(-628./\text{temp}) * \text{temp}^{**}(-1.32)$                | Kohlmann and Poppe (1999) |
| G3212 | TrGN     | $\text{NH}_2 + \text{HO}_2 \rightarrow \text{HNO} + \text{H}_2\text{O}$                                                                                          | $9.4 \text{E}-09 * \text{EXP}(-356./\text{temp}) * \text{temp}^{**}(-1.12)$                | Kohlmann and Poppe (1999) |
| G3213 | TrGN     | $\text{NH}_2 + \text{NO} \rightarrow \text{HO}_2 + \text{OH} + \text{N}_2$                                                                                       | $1.92 \text{E}-12 * ((\text{temp}/298.)^{**}(-1.5))$                                       | Kohlmann and Poppe (1999) |
| G3214 | TrGN     | $\text{NH}_2 + \text{NO} \rightarrow \text{N}_2 + \text{H}_2\text{O}$                                                                                            | $1.41 \text{E}-11 * ((\text{temp}/298.)^{**}(-1.5))$                                       | Kohlmann and Poppe (1999) |
| G3215 | TrGN     | $\text{NH}_2 + \text{NO}_2 \rightarrow 1. \text{ LossO3} + \text{N}_2\text{O} + \text{H}_2\text{O}$                                                              | $1.2 \text{E}-11 * ((\text{temp}/298.)^{**}(-2.0))$                                        | Kohlmann and Poppe (1999) |
| G3216 | TrGN     | $\text{NH}_2 + \text{NO}_2 \rightarrow 1. \text{ LossO3} + \text{NH}_2\text{O} + \text{NO}$                                                                      | $0.8 \text{E}-11 * ((\text{temp}/298.)^{**}(-2.0))$                                        | Kohlmann and Poppe (1999) |
| G3217 | TrGN     | $\text{NH}_2\text{O} + \text{O}_3 \rightarrow 1. \text{ LossO3} + \text{NH}_2 + \text{O}_2$                                                                      | $1.2 \text{E}-14$                                                                          | Kohlmann and Poppe (1999) |
| G3218 | TrGN     | $\text{NH}_2\text{O} \rightarrow \text{NHOH}$                                                                                                                    | $1.3 \text{E}3$                                                                            | Kohlmann and Poppe (1999) |
| G3219 | TrGN     | $\text{HNO} + \text{OH} \rightarrow \text{NO} + \text{H}_2\text{O}$                                                                                              | $8.0 \text{E}-11 * \text{EXP}(-500./\text{temp})$                                          | Kohlmann and Poppe (1999) |

Table 1: Gas phase reactions (... continued)

| #      | labels   | reaction                                                                                                                                                                                                                                                    | rate coefficient                                                                                           | reference                 |
|--------|----------|-------------------------------------------------------------------------------------------------------------------------------------------------------------------------------------------------------------------------------------------------------------|------------------------------------------------------------------------------------------------------------|---------------------------|
| G3220  | TrGN     | $\text{HNO} + \text{NHOH} \rightarrow \text{NH}_2\text{OH} + \text{NO}$                                                                                                                                                                                     | $1.66\text{E-}12 \cdot \text{EXP}(-1500./\text{temp})$                                                     | Kohlmann and Poppe (1999) |
| G3221  | TrGN     | $\text{HNO} + \text{NO}_2 \rightarrow 1. \text{ LossO3} + \text{HONO} + \text{NO}$                                                                                                                                                                          | $1.0\text{E-}12 \cdot \text{EXP}(-1000./\text{temp})$                                                      | Kohlmann and Poppe (1999) |
| G3222  | TrGN     | $\text{NHOH} + \text{OH} \rightarrow \text{HNO} + \text{H}_2\text{O}$                                                                                                                                                                                       | $1.66\text{E-}12$                                                                                          | Kohlmann and Poppe (1999) |
| G3223  | TrGN     | $\text{NH}_2\text{OH} + \text{OH} \rightarrow \text{NHOH} + \text{H}_2\text{O}$                                                                                                                                                                             | $4.13\text{E-}11 \cdot \text{EXP}(-2138./\text{temp})$                                                     | Kohlmann and Poppe (1999) |
| G3224  | TrGN     | $\text{HNO} + \text{O}_2 \rightarrow \text{HO}_2 + \text{NO}$                                                                                                                                                                                               | $3.65\text{E-}14 \cdot \text{EXP}(-4600./\text{temp})$                                                     | Kohlmann and Poppe (1999) |
| G4100  | UpStG    | $\text{CH}_4 + \text{O}(^1\text{D}) \rightarrow 1.0 \text{ o3lossxo} + 1. \text{ LossO3} + .75 \text{ CH}_3\text{O}_2 + .75 \text{ OH} + .25 \text{ HCHO} + .4 \text{ H} + .05 \text{ H}_2$                                                                 | $1.75\text{E-}10$                                                                                          | Sander et al. (2011)      |
| G4101  | StTrG    | $\text{CH}_4 + \text{OH} \rightarrow \text{CH}_3\text{O}_2 + \text{H}_2\text{O}$                                                                                                                                                                            | $1.85\text{E-}20 \cdot \text{EXP}(2.82 \cdot \text{LOG}(\text{temp}) - 987./\text{temp})$                  | Atkinson (2003)           |
| G4102  | TrG      | $\text{CH}_3\text{OH} + \text{OH} \rightarrow \text{HCHO} + \text{HO}_2$                                                                                                                                                                                    | $2.9\text{E-}12 \cdot \text{EXP}(-345./\text{temp})$                                                       | Sander et al. (2011)      |
| G4103  | StTrG    | $\text{CH}_3\text{O}_2 + \text{HO}_2 \rightarrow \text{ho2loss} + \text{CH}_3\text{OOH} + \text{O}_2$                                                                                                                                                       | $4.1\text{E-}13 \cdot \text{EXP}(750./\text{temp})$                                                        | Sander et al. (2011)*     |
| G4104  | UpStTrGN | $\text{CH}_3\text{O}_2 + \text{NO} \rightarrow 1.0 \text{ o3prodro2} + \text{noprodro2} + \text{ProdMeO2} + 1. \text{ ProdO3} + \text{HCHO} + \text{NO}_2 + \text{HO}_2$                                                                                    | $2.8\text{E-}12 \cdot \text{EXP}(300./\text{temp})$                                                        | Sander et al. (2011)      |
| G4105  | TrGN     | $\text{CH}_3\text{O}_2 + \text{NO}_3 \rightarrow 1.0 \text{ o3lossno} + \text{LossO3N} + 1. \text{ LossO3} + \text{HCHO} + \text{HO}_2 + \text{NO}_2$                                                                                                       | $1.3\text{E-}12$                                                                                           | Atkinson et al. (2006)    |
| G4106a | StTrG    | $\text{CH}_3\text{O}_2 + \text{CH}_3\text{O}_2 \rightarrow 2 \text{ HCHO} + 2 \text{ HO}_2$                                                                                                                                                                 | $9.5\text{E-}14 \cdot \text{EXP}(390./\text{temp}) / (1. + 1. / 26.2 \cdot \text{EXP}(1130./\text{temp}))$ | Sander et al. (2011)      |
| G4106b | StTrG    | $\text{CH}_3\text{O}_2 + \text{CH}_3\text{O}_2 \rightarrow \text{HCHO} + \text{CH}_3\text{OH} + \text{O}_2$                                                                                                                                                 | $9.5\text{E-}14 \cdot \text{EXP}(390./\text{temp}) / (1. + 26.2 \cdot \text{EXP}(-1130./\text{temp}))$     | Sander et al. (2011)      |
| G4107  | StTrG    | $\text{CH}_3\text{OOH} + \text{OH} \rightarrow .7 \text{ CH}_3\text{O}_2 + .3 \text{ HCHO} + .3 \text{ OH} + \text{H}_2\text{O}$                                                                                                                            | $k_{\text{CH3OOH\_OH}}$                                                                                    | Wallington et al.         |
| G4108  | StTrG    | $\text{HCHO} + \text{OH} \rightarrow \text{CO} + \text{H}_2\text{O} + \text{HO}_2$                                                                                                                                                                          | $9.52\text{E-}18 \cdot \text{EXP}(2.03 \cdot \text{LOG}(\text{temp}) + 636./\text{temp})$                  | Sivakumaran et al. (2003) |
| G4109  | TrGN     | $\text{HCHO} + \text{NO}_3 \rightarrow 1.0 \text{ o3lossno} + \text{LossO3N} + 1. \text{ LossO3} + \text{HNO}_3 + \text{CO} + \text{HO}_2$                                                                                                                  | $3.4\text{E-}13 \cdot \text{EXP}(-1900./\text{temp})$                                                      | Sander et al. (2011)*     |
| G4110  | UpStTrG  | $\text{CO} + \text{OH} \rightarrow 1.0 \text{ LossG4110} + \text{H} + \text{CO}_2$                                                                                                                                                                          | $(1.57\text{E-}13 + \text{cair} \cdot 3.54\text{E-}33)$                                                    | McCabe et al. (2001)      |
| G4111  | TrG      | $\text{HCOOH} + \text{OH} \rightarrow \text{CO}_2 + \text{HO}_2 + \text{H}_2\text{O}$                                                                                                                                                                       | $4.0\text{E-}13$                                                                                           | Sander et al. (2011)      |
| G4200  | TrGC     | $\text{C}_2\text{H}_6 + \text{OH} \rightarrow \text{C}_2\text{H}_5\text{O}_2 + \text{H}_2\text{O}$                                                                                                                                                          | $1.49\text{E-}17 \cdot \text{temp} \cdot \text{temp} \cdot \text{EXP}(-499./\text{temp})$                  | Atkinson (2003)           |
| G4201  | TrGC     | $\text{C}_2\text{H}_4 + \text{O}_3 \rightarrow 1.0 \text{ o3lossro} + \text{LossO3R} + 1. \text{ LossO3} + \text{HCHO} + .63 \text{ CO} + .13 \text{ HO}_2 + 0.23125 \text{ HCOOH} + 0.13875 \text{ HCHO} + 0.13875 \text{ H}_2\text{O}_2 + .13 \text{ OH}$ | $1.2\text{E-}14 \cdot \text{EXP}(-2630./\text{temp})$                                                      | Sander et al. (2011)*     |
| G4202  | TrGC     | $\text{C}_2\text{H}_4 + \text{OH} \rightarrow .6666667 \text{ CH}_3\text{CH}(\text{O}_2)\text{CH}_2\text{OH}$                                                                                                                                               | $k_{\text{3rd}}(\text{temp}, \text{cair}, 1.0\text{E-}28, 4.5, 7.5\text{E-}12, 0.85, 0.6)$                 | Sander et al. (2011)      |
| G4203  | TrGC     | $\text{C}_2\text{H}_5\text{O}_2 + \text{HO}_2 \rightarrow \text{C}_2\text{H}_5\text{OOH}$                                                                                                                                                                   | $7.5\text{E-}13 \cdot \text{EXP}(700./\text{temp})$                                                        | Sander et al. (2011)      |
| G4204  | TrGNC    | $\text{C}_2\text{H}_5\text{O}_2 + \text{NO} \rightarrow 1.0 \text{ o3prodro2} + \text{ProdRO2} + 1. \text{ ProdO3} + \text{CH}_3\text{CHO} + \text{HO}_2 + \text{NO}_2$                                                                                     | $2.6\text{E-}12 \cdot \text{EXP}(365./\text{temp})$                                                        | Sander et al. (2011)      |
| G4205  | TrGNC    | $\text{C}_2\text{H}_5\text{O}_2 + \text{NO}_3 \rightarrow 1.0 \text{ o3lossno} + 1. \text{ LossO3} + \text{CH}_3\text{CHO} + \text{HO}_2 + \text{NO}_2$                                                                                                     | $2.3\text{E-}12$                                                                                           | Wallington et al.         |

Table 1: Gas phase reactions (... continued)

| #      | labels | reaction                                                                                                                                                                                                                                                                                                                                                              | rate coefficient                                                                        | reference                                        |
|--------|--------|-----------------------------------------------------------------------------------------------------------------------------------------------------------------------------------------------------------------------------------------------------------------------------------------------------------------------------------------------------------------------|-----------------------------------------------------------------------------------------|--------------------------------------------------|
| G4206  | TrGC   | $\text{C}_2\text{H}_5\text{O}_2 + \text{CH}_3\text{O}_2 \rightarrow .75 \text{HCHO} + \text{HO}_2 + .75 \text{CH}_3\text{CHO} + .25 \text{CH}_3\text{OH}$                                                                                                                                                                                                             | $1.6\text{E-}13*\text{EXP}(195./\text{temp})$                                           | see note*                                        |
| G4207  | TrGC   | $\text{C}_2\text{H}_5\text{OOH} + \text{OH} \rightarrow .3 \text{C}_2\text{H}_5\text{O}_2 + .7 \text{CH}_3\text{CHO} + .7 \text{OH}$                                                                                                                                                                                                                                  | k_CH300H_OH                                                                             | see note*                                        |
| G4208  | TrGC   | $\text{CH}_3\text{CHO} + \text{OH} \rightarrow \text{CH}_3\text{C(O)OO} + \text{H}_2\text{O}$                                                                                                                                                                                                                                                                         | $4.4\text{E-}12*\text{EXP}(365./\text{temp})$                                           | Atkinson et al. (2006)                           |
| G4209  | TrGNC  | $\text{CH}_3\text{CHO} + \text{NO}_3 \rightarrow 1.0 \text{o3lossno} + \text{LossO3N} + 1. \text{LossO3} + \text{CH}_3\text{C(O)OO} + \text{HNO}_3$                                                                                                                                                                                                                   | $1.4\text{E-}12*\text{EXP}(-1900./\text{temp})$                                         | Sander et al. (2011)                             |
| G4210  | TrGC   | $\text{CH}_3\text{COOH} + \text{OH} \rightarrow \text{CH}_3\text{O}_2 + \text{CO}_2 + \text{H}_2\text{O}$                                                                                                                                                                                                                                                             | $4.2\text{E-}14*\text{EXP}(855./\text{temp})$                                           | Atkinson et al. (2006)                           |
| G4211a | TrGC   | $\text{CH}_3\text{C(O)OO} + \text{HO}_2 \rightarrow \text{CH}_3\text{C(O)OOH}$                                                                                                                                                                                                                                                                                        | $4.3\text{E-}13*\text{EXP}(1040./\text{temp})/(1.+1./37.*\text{EXP}(660./\text{temp}))$ | Tyndall et al. (2001)                            |
| G4211b | TrGC   | $\text{CH}_3\text{C(O)OO} + \text{HO}_2 \rightarrow 1.0 \text{o3prodro2} + 1. \text{ProdO3} + \text{CH}_3\text{COOH} + \text{O}_3$                                                                                                                                                                                                                                    | $4.3\text{E-}13*\text{EXP}(1040./\text{temp})/(1.+37.*\text{EXP}(-660./\text{temp}))$   | Tyndall et al. (2001)                            |
| G4212  | TrGNC  | $\text{CH}_3\text{C(O)OO} + \text{NO} \rightarrow 1.0 \text{o3prodro2} + \text{ProdRO2} + 1. \text{ProdO3} + \text{CH}_3\text{O}_2 + \text{CO}_2 + \text{NO}_2$                                                                                                                                                                                                       | $8.1\text{E-}12*\text{EXP}(270./\text{temp})$                                           | Tyndall et al. (2001)                            |
| G4213  | TrGNC  | $\text{CH}_3\text{C(O)OO} + \text{NO}_2 \rightarrow \text{panprod} + \text{PAN}$                                                                                                                                                                                                                                                                                      | k_CH3C03_N02                                                                            | Sander et al. (2011)*                            |
| G4214  | TrGNC  | $\text{CH}_3\text{C(O)OO} + \text{NO}_3 \rightarrow 1.0 \text{o3lossno} + \text{LossO3N} + 1. \text{LossO3} + \text{CH}_3\text{O}_2 + \text{NO}_2 + \text{CO}_2$                                                                                                                                                                                                      | 4.E-12                                                                                  | Canosa-Mas et al. (1996)                         |
| G4215a | TrGC   | $\text{CH}_3\text{C(O)OO} + \text{CH}_3\text{O}_2 \rightarrow \text{HCHO} + \text{HO}_2 + \text{CH}_3\text{O}_2 + \text{CO}_2$                                                                                                                                                                                                                                        | $0.9*2.0\text{E-}12*\text{EXP}(500./\text{temp})$                                       | Sander et al. (2011)                             |
| G4215b | TrGC   | $\text{CH}_3\text{C(O)OO} + \text{CH}_3\text{O}_2 \rightarrow \text{CH}_3\text{COOH} + \text{HCHO}$                                                                                                                                                                                                                                                                   | $0.1*2.0\text{E-}12*\text{EXP}(500./\text{temp})$                                       | Sander et al. (2011)                             |
| G4216  | TrGC   | $\text{CH}_3\text{C(O)OO} + \text{C}_2\text{H}_5\text{O}_2 \rightarrow .82 \text{CH}_3\text{O}_2 + \text{CH}_3\text{CHO} + .82 \text{HO}_2 + .18 \text{CH}_3\text{COOH}$                                                                                                                                                                                              | $4.9\text{E-}12*\text{EXP}(211./\text{temp})$                                           | Wallington et al., Kirchner and Stockwell (1996) |
| G4217  | TrGC   | $\text{CH}_3\text{C(O)OO} + \text{CH}_3\text{C(O)OO} \rightarrow 2 \text{CH}_3\text{O}_2 + 2 \text{CO}_2 + \text{O}_2$                                                                                                                                                                                                                                                | $2.5\text{E-}12*\text{EXP}(500./\text{temp})$                                           | Tyndall et al. (2001)                            |
| G4218  | TrGC   | $\text{CH}_3\text{C(O)OOH} + \text{OH} \rightarrow \text{CH}_3\text{C(O)OO} + \text{H}_2\text{O}$                                                                                                                                                                                                                                                                     | $0.6*k_{\text{CH300H\_OH}}$                                                             | Rickard and Pascoe (2009)                        |
| G4219  | TrGNC  | $\text{NACA} + \text{OH} \rightarrow \text{NO}_2 + \text{HCHO} + \text{CO}$                                                                                                                                                                                                                                                                                           | $5.6\text{E-}12*\text{EXP}(270./\text{temp})$                                           | Pöschl et al. (2000)                             |
| G4220  | TrGNC  | $\text{PAN} + \text{OH} \rightarrow \text{panloss} + \text{HCHO} + \text{CO} + \text{NO}_2 + \text{H}_2\text{O}$                                                                                                                                                                                                                                                      | $9.50\text{E-}13*\text{EXP}(-650./\text{temp})$                                         | Rickard and Pascoe (2009)                        |
| G4221  | TrGNC  | $\text{PAN} \rightarrow \text{panloss} + \text{CH}_3\text{C(O)OO} + \text{NO}_2$                                                                                                                                                                                                                                                                                      | k_PAN_M                                                                                 | Sander et al. (2011)*                            |
| G4300  | TrGC   | $\text{C}_3\text{H}_8 + \text{OH} \rightarrow .82 \text{iC}_3\text{H}_7\text{O}_2 + .18 \text{C}_2\text{H}_5\text{O}_2 + \text{H}_2\text{O}$                                                                                                                                                                                                                          | $1.65\text{E-}17*\text{temp}*\text{temp}*\text{EXP}(-87./\text{temp})$                  | Atkinson (2003)                                  |
| G4301  | TrGC   | $\text{C}_3\text{H}_6 + \text{O}_3 \rightarrow \text{LossO3R} + 1. \text{LossO3} + .57 \text{HCHO} + .47 \text{CH}_3\text{CHO} + .33 \text{OH} + .26 \text{HO}_2 + .07 \text{CH}_3\text{O}_2 + .06 \text{C}_2\text{H}_5\text{O}_2 + .23 \text{CH}_3\text{C(O)OO} + .04 \text{MGlyOX} + .06 \text{CH}_4 + .31 \text{CO} + .22 \text{HCOOH} + .03 \text{CH}_3\text{OH}$ | $6.5\text{E-}15*\text{EXP}(-1900./\text{temp})$                                         | Sander et al. (2011)                             |
| G4302  | TrGC   | $\text{C}_3\text{H}_6 + \text{OH} \rightarrow \text{CH}_3\text{CH(O}_2\text{)CH}_2\text{OH}$                                                                                                                                                                                                                                                                          | k_3rd(temp, cair, 8.E-27, 3.5, 3.E-11, 0., 0.5)                                         | Wallington et al.                                |
| G4303  | TrGNC  | $\text{C}_3\text{H}_6 + \text{NO}_3 \rightarrow 1.0 \text{o3lossno} + 1. \text{LossO3} + \text{LC4H9NO3}$                                                                                                                                                                                                                                                             | $4.6\text{E-}13*\text{EXP}(-1155./\text{temp})$                                         | Wallington et al.                                |
| G4304  | TrGC   | $\text{iC}_3\text{H}_7\text{O}_2 + \text{HO}_2 \rightarrow \text{iC}_3\text{H}_7\text{OOH}$                                                                                                                                                                                                                                                                           | k_PrO2_H02                                                                              | Atkinson (1997)                                  |

Table 1: Gas phase reactions (... continued)

| #     | labels | reaction                                                                                                                                                                        | rate coefficient                                                 | reference                     |
|-------|--------|---------------------------------------------------------------------------------------------------------------------------------------------------------------------------------|------------------------------------------------------------------|-------------------------------|
| G4305 | TrGNC  | $iC_3H_7O_2 + NO \rightarrow 1.0 \text{ o3prodho2} + \text{ProdRO2} + 1. \text{ ProdO3}$<br>$+ .96 CH_3COCH_3 + .96 HO_2 + .96 NO_2 + .04 iC_3H_7ONO_2$                         | k_Pr02_N0                                                        | Wallington et al.             |
| G4306 | TrGC   | $iC_3H_7O_2 + CH_3O_2 \rightarrow CH_3COCH_3 + .8 HCHO + .8 HO_2$<br>$+ .2 CH_3OH$                                                                                              | k_Pr02_CH302                                                     | Kirchner and Stockwell (1996) |
| G4307 | TrGC   | $iC_3H_7OOH + OH \rightarrow .3 iC_3H_7O_2 + .7 CH_3COCH_3 + .7 OH$                                                                                                             | k_CH300H_OH                                                      | see note*                     |
| G4308 | TrGC   | $CH_3CH(O_2)CH_2OH + HO_2 \rightarrow CH_3CH(OOH)CH_2OH$                                                                                                                        | $6.5E-13*EXP(650./temp)$                                         | Müller and Brasseur (1995)    |
| G4309 | TrGNC  | $CH_3CH(O_2)CH_2OH + NO \rightarrow 1.0 \text{ o3prodro2} + \text{ProdRO2}$<br>$+ 1. \text{ ProdO3} + .98 CH_3CHO + .98 HCHO + .98 HO_2 +$<br>$.98 NO_2 + .02 LC4H9NO3$         | $4.2E-12*EXP(180./temp)$                                         | Müller and Brasseur (1995)    |
| G4310 | TrGC   | $CH_3CH(OOH)CH_2OH + OH \rightarrow .5 CH_3CH(O_2)CH_2OH +$<br>$.5 CH_3COCH_2OH + .5 OH + H_2O$                                                                                 | $3.8E-12*EXP(200./temp)$                                         | Müller and Brasseur (1995)    |
| G4311 | TrGC   | $CH_3COCH_3 + OH \rightarrow CH_3COCH_2O_2 + H_2O$                                                                                                                              | $1.33E-13+3.82E-11*EXP(-2000./temp)$                             | Sander et al. (2011)          |
| G4312 | TrGC   | $CH_3COCH_2O_2 + HO_2 \rightarrow CH_3COCH_2O_2H$                                                                                                                               | $8.6E-13*EXP(700./temp)$                                         | Tyndall et al. (2001)         |
| G4313 | TrGNC  | $CH_3COCH_2O_2 + NO \rightarrow 1.0 \text{ o3prodro2} + \text{ProdRO2} + 1.$<br>$\text{ProdO3} + CH_3C(O)OO + HCHO + NO_2$                                                      | $2.9E-12*EXP(300./temp)$                                         | Sander et al. (2011)          |
| G4314 | TrGC   | $CH_3COCH_2O_2 + CH_3O_2 \rightarrow .5 MGLYOX + .5 CH_3OH +$<br>$.3 CH_3C(O)OO + .8 HCHO + .3 HO_2 + .2 CH_3COCH_2OH$                                                          | $7.5E-13*EXP(500./temp)$                                         | Tyndall et al. (2001)         |
| G4315 | TrGC   | $CH_3COCH_2O_2H + OH \rightarrow .3 CH_3COCH_2O_2 + .7$<br>$MGLYOX + .7 OH$                                                                                                     | k_CH300H_OH                                                      | see note*                     |
| G4316 | TrGC   | $CH_3COCH_2OH + OH \rightarrow MGLYOX + HO_2$                                                                                                                                   | $2.15E-12*EXP(305./temp)$                                        | Dillon et al. (2006)          |
| G4317 | TrGC   | $MGLYOX + OH \rightarrow CH_3C(O)OO + CO$                                                                                                                                       | $8.4E-13*EXP(830./temp)$                                         | Tyndall et al. (1995)         |
| G4320 | TrGNC  | $iC_3H_7ONO_2 + OH \rightarrow CH_3COCH_3 + NO_2$                                                                                                                               | $6.2E-13*EXP(-230./temp)$                                        | Wallington et al.             |
| G4400 | TrGC   | $nC_4H_{10} + OH \rightarrow LC_4H_9O_2 + H_2O$                                                                                                                                 | $1.81E-17*temp*temp*EXP(114./temp)$                              | Atkinson (2003)               |
| G4401 | TrGC   | $LC_4H_9O_2 + CH_3O_2 \rightarrow .88 MEK + .68 HCHO + 1.23 HO_2$<br>$+ .12 CH_3CHO + .12 C_2H_5O_2 + .18 CH_3OH$                                                               | k_Pr02_CH302                                                     | see note*                     |
| G4402 | TrGC   | $LC_4H_9O_2 + HO_2 \rightarrow LC_4H_9OOH$                                                                                                                                      | k_Pr02_H02                                                       | see note*                     |
| G4403 | TrGNC  | $LC_4H_9O_2 + NO \rightarrow 1.0 \text{ o3prodro2} + \text{ProdRO2} + 1. \text{ ProdO3}$<br>$+ .84 NO_2 + .56 MEK + .56 HO_2 + .28 C_2H_5O_2 + .28$<br>$CH_3CHO + .16 LC4H9NO3$ | k_Pr02_N0                                                        | see note*                     |
| G4404 | TrGC   | $LC_4H_9OOH + OH \rightarrow .15 LC_4H_9O_2 + .85 MEK + .85 OH$<br>$+ .85 H_2O$                                                                                                 | k_CH300H_OH                                                      | see note*                     |
| G4405 | TrGC   | $MVK + O_3 \rightarrow 1.0 \text{ o3lossro} + \text{LossO3R} + 1. \text{ LossO3} + .45$<br>$HCOOH + .9 MGLYOX + .1 CH_3C(O)OO + .19 OH +$<br>$.22 CO + .32 HO_2$                | $.5*(1.36E-15*EXP(-2112./temp)$<br>$+7.51E-16*EXP(-1521./temp))$ | Pöschl et al. (2000)          |

Table 1: Gas phase reactions (... continued)

| #     | labels | reaction                                                                                                                                                                                                                                                                        | rate coefficient                                          | reference             |
|-------|--------|---------------------------------------------------------------------------------------------------------------------------------------------------------------------------------------------------------------------------------------------------------------------------------|-----------------------------------------------------------|-----------------------|
| G4406 | TrGC   | MVK + OH $\rightarrow$ MVKO2                                                                                                                                                                                                                                                    | .5*(4.1E-12*EXP(452./temp)<br>+1.9E-11*EXP(175./temp))    | Pöschl et al. (2000)  |
| G4407 | TrGC   | MVKO2 + HO <sub>2</sub> $\rightarrow$ MVKOOH                                                                                                                                                                                                                                    | 1.82E-13*EXP(1300./temp)                                  | Pöschl et al. (2000)  |
| G4408 | TrGNC  | MVKO2 + NO $\rightarrow$ 1.0 o3prodro2 + ProdRO2 + 1. ProdO3<br>+ NO <sub>2</sub> + .25 CH <sub>3</sub> C(O)OO + .25 CH <sub>3</sub> COCH <sub>2</sub> OH + .75<br>HCHO + .25 CO + .75 HO <sub>2</sub> + .5 MGLYOX                                                              | 2.54E-12*EXP(360./temp)                                   | Pöschl et al. (2000)  |
| G4409 | TrGNC  | MVKO2 + NO <sub>2</sub> $\rightarrow$ MPAN                                                                                                                                                                                                                                      | .25*k_3rd(temp, cair, 9.7E-29, 5.6,<br>9.3E-12, 1.5, 0.6) | Pöschl et al. (2000)  |
| G4410 | TrGC   | MVKO2 + CH <sub>3</sub> O <sub>2</sub> $\rightarrow$ .5 MGLYOX + .375 CH <sub>3</sub> COCH <sub>2</sub> OH<br>+ .125 CH <sub>3</sub> C(O)OO + 1.125 HCHO + .875 HO <sub>2</sub> + .125<br>CO + .25 CH <sub>3</sub> OH                                                           | 2.E-12                                                    | von Kuhlmann (2001)   |
| G4411 | TrGC   | MVKO2 + MVK $\rightarrow$ CH <sub>3</sub> COCH <sub>2</sub> OH + MGLYOX + .5<br>CO + .5 HCHO + HO <sub>2</sub>                                                                                                                                                                  | 2.E-12                                                    | Pöschl et al. (2000)  |
| G4412 | TrGC   | MVKOOH + OH $\rightarrow$ MVKO2                                                                                                                                                                                                                                                 | 3.E-11                                                    | Pöschl et al. (2000)  |
| G4413 | TrGC   | MEK + OH $\rightarrow$ LMEKO2                                                                                                                                                                                                                                                   | 1.3E-12*EXP(-25./temp)                                    | Wallington et al.     |
| G4414 | TrGC   | LMEKO2 + HO <sub>2</sub> $\rightarrow$ LMEKOOH                                                                                                                                                                                                                                  | k_PrO2_HO2                                                | see note*             |
| G4415 | TrGNC  | LMEKO2 + NO $\rightarrow$ 1.0 o3prodro2 + ProdRO2 + 1. ProdO3<br>+ .985 CH <sub>3</sub> CHO + .985 CH <sub>3</sub> C(O)OO + .985 NO <sub>2</sub> + .015<br>LC4H9NO3                                                                                                             | k_PrO2_NO                                                 | see note*             |
| G4416 | TrGC   | LMEKOOH + OH $\rightarrow$ .8 BIACET + .8 OH + .2 LMEKO2                                                                                                                                                                                                                        | k_CH300H_OH                                               | see note*             |
| G4417 | TrGNC  | LC4H9NO3 + OH $\rightarrow$ MEK + NO <sub>2</sub> + H <sub>2</sub> O                                                                                                                                                                                                            | 1.7E-12                                                   | Wallington et al.     |
| G4418 | TrGNC  | MPAN + OH $\rightarrow$ CH <sub>3</sub> COCH <sub>2</sub> OH + NO <sub>2</sub>                                                                                                                                                                                                  | 3.2E-11                                                   | Orlando et al. (2002) |
| G4419 | TrGNC  | MPAN $\rightarrow$ MVKO2 + NO <sub>2</sub>                                                                                                                                                                                                                                      | k_PAN_M                                                   | see note*             |
| G4500 | TrGC   | C <sub>5</sub> H <sub>8</sub> + O <sub>3</sub> $\rightarrow$ LossO3R + 1. LossO3 + .28 HCOOH +<br>.65 MVK + .1 MVKO2 + .1 CH <sub>3</sub> C(O)OO + .14 CO + .58<br>HCHO + .09 H <sub>2</sub> O <sub>2</sub> + .08 CH <sub>3</sub> O <sub>2</sub> + .25 OH + .25 HO <sub>2</sub> | 7.86E-15*EXP(-1913./temp)                                 | Pöschl et al. (2000)  |
| G4501 | TrGC   | C <sub>5</sub> H <sub>8</sub> + OH $\rightarrow$ ISO2                                                                                                                                                                                                                           | 2.54E-11*EXP(410./temp)                                   | Pöschl et al. (2000)  |
| G4502 | TrGNC  | C <sub>5</sub> H <sub>8</sub> + NO <sub>3</sub> $\rightarrow$ 1.0 o3lossno + 1. LossO3 + ISON                                                                                                                                                                                   | 3.03E-12*EXP(-446./temp)                                  | Pöschl et al. (2000)  |
| G4503 | TrGC   | ISO2 + HO <sub>2</sub> $\rightarrow$ ISOOH                                                                                                                                                                                                                                      | 2.22E-13*EXP(1300./temp)                                  | Boyd et al. (2003)    |
| G4504 | TrGNC  | ISO2 + NO $\rightarrow$ 1.0 o3prodro2 + ProdRO2 + 1. ProdO3 +<br>.956 NO <sub>2</sub> + .956 MVK + .956 HCHO + .956 HO <sub>2</sub> + .044<br>ISON                                                                                                                              | 2.54E-12*EXP(360./temp)                                   | Pöschl et al. (2000)  |
| G4505 | TrGC   | ISO2 + CH <sub>3</sub> O <sub>2</sub> $\rightarrow$ .5 MVK + 1.25 HCHO + HO <sub>2</sub> + .25<br>MGLYOX + .25 CH <sub>3</sub> COCH <sub>2</sub> OH + .25 CH <sub>3</sub> OH                                                                                                    | 2.E-12                                                    | von Kuhlmann (2001)   |
| G4506 | TrGC   | ISO2 + ISO2 $\rightarrow$ 2 MVK + HCHO + HO <sub>2</sub>                                                                                                                                                                                                                        | 2.E-12                                                    | Pöschl et al. (2000)  |

Table 1: Gas phase reactions (... continued)

| #      | labels     | reaction                                                                                                             | rate coefficient                                       | reference                                     |
|--------|------------|----------------------------------------------------------------------------------------------------------------------|--------------------------------------------------------|-----------------------------------------------|
| G4507  | TrGC       | ISOOH + OH $\rightarrow$ MVK + OH                                                                                    | 1.E-10                                                 | Pöschl et al. (2000)                          |
| G4508  | TrGNC      | ISON + OH $\rightarrow$ CH <sub>3</sub> COCH <sub>2</sub> OH + NACA                                                  | 1.3E-11                                                | Pöschl et al. (2000)                          |
| G6100  | UpStTrGCl  | Cl + O <sub>3</sub> $\rightarrow$ ClO + O <sub>2</sub>                                                               | 2.8E-11*EXP(-250./temp)                                | Atkinson et al. (2007)                        |
| G6101  | UpStGCl    | ClO + O( <sup>3</sup> P) $\rightarrow$ 2.0 LossO3Cl + 2. LossO3 + Cl + O <sub>2</sub>                                | 2.5E-11*EXP(110./temp)                                 | Atkinson et al. (2007)                        |
| G6102a | StTrGCl    | ClO + ClO $\rightarrow$ 2. LossO3 + Cl <sub>2</sub> + O <sub>2</sub>                                                 | 1.0E-12*EXP(-1590./temp)                               | Atkinson et al. (2007)                        |
| G6102b | StTrGCl    | ClO + ClO $\rightarrow$ 2. LossO3 + 2 Cl + O <sub>2</sub>                                                            | 3.0E-11*EXP(-2450./temp)                               | Atkinson et al. (2007)                        |
| G6102c | StTrGCl    | ClO + ClO $\rightarrow$ 1. LossO3 + Cl + OClO                                                                        | 3.5E-13*EXP(-1370./temp)                               | Atkinson et al. (2007)                        |
| G6102d | StTrGCl    | ClO + ClO $\rightarrow$ Cl <sub>2</sub> O <sub>2</sub>                                                               | k_ClO_ClO                                              | Atkinson et al. (2007)                        |
| G6103  | StTrGCl    | Cl <sub>2</sub> O <sub>2</sub> $\rightarrow$ ClO + ClO                                                               | k_ClO_ClO/(1.72E-27*EXP(8649./temp))                   | Atkinson et al. (2007), Sander et al. (2011)* |
| G6200  | StGCl      | Cl + H <sub>2</sub> $\rightarrow$ HCl + H                                                                            | 3.9E-11*EXP(-2310./temp)                               | Atkinson et al. (2007)                        |
| G6201a | StGCl      | Cl + HO <sub>2</sub> $\rightarrow$ HCl + O <sub>2</sub>                                                              | 4.4E-11-7.5E-11*EXP(-620./temp)                        | Atkinson et al. (2007)                        |
| G6201b | StGCl      | Cl + HO <sub>2</sub> $\rightarrow$ LossO3Cln + 1. ProdO3 + ClO + OH                                                  | 7.5E-11*EXP(-620./temp)                                | Atkinson et al. (2007)                        |
| G6202  | StTrGCl    | Cl + H <sub>2</sub> O <sub>2</sub> $\rightarrow$ HCl + HO <sub>2</sub>                                               | 1.1E-11*EXP(-980./temp)                                | Atkinson et al. (2007)                        |
| G6203  | StGCl      | ClO + OH $\rightarrow$ LossO3Cl + 1. LossO3 + .94 Cl + .94 HO <sub>2</sub> + .06 HCl + .06 O <sub>2</sub>            | 7.3E-12*EXP(300./temp)                                 | Atkinson et al. (2007)                        |
| G6204  | StTrGCl    | ClO + HO <sub>2</sub> $\rightarrow$ HOCl + O <sub>2</sub>                                                            | 2.2E-12*EXP(340./temp)                                 | Atkinson et al. (2007)*                       |
| G6205  | StTrGCl    | HCl + OH $\rightarrow$ Cl + H <sub>2</sub> O                                                                         | 1.7E-12*EXP(-230./temp)                                | Atkinson et al. (2007)                        |
| G6206  | StGCl      | HOCl + OH $\rightarrow$ ClO + H <sub>2</sub> O                                                                       | 3.0E-12*EXP(-500./temp)                                | Sander et al. (2011)                          |
| G6300  | UpStTrGNCl | ClO + NO $\rightarrow$ 1.0 LossO3Cl + LossO3Nn + NO <sub>2</sub> + Cl                                                | 6.2E-12*EXP(295./temp)                                 | Atkinson et al. (2007)                        |
| G6301  | StTrGNCl   | ClO + NO <sub>2</sub> $\rightarrow$ ClNO <sub>3</sub>                                                                | k_3rd_iupac(temp, cair, 1.6E-31, 3.4, 7.E-11, 0., 0.4) | Atkinson et al. (2007)                        |
| G6302  | TrGNCl     | ClNO <sub>3</sub> $\rightarrow$ ClO + NO <sub>2</sub>                                                                | 6.918E-7*EXP(-10909./temp)*cair                        | Anderson and Fahey (1990)                     |
| G6303  | StGNCl     | ClNO <sub>3</sub> + O( <sup>3</sup> P) $\rightarrow$ ClO + NO <sub>3</sub>                                           | 4.5E-12*EXP(-900./temp)                                | Atkinson et al. (2007)                        |
| G6304  | StTrGNCl   | ClNO <sub>3</sub> + Cl $\rightarrow$ Cl <sub>2</sub> + NO <sub>3</sub>                                               | 6.2E-12*EXP(145./temp)                                 | Atkinson et al. (2007)                        |
| G6400  | StTrGCl    | Cl + CH <sub>4</sub> $\rightarrow$ HCl + CH <sub>3</sub> O <sub>2</sub>                                              | 6.6E-12*EXP(-1240./temp)                               | Atkinson et al. (2006)                        |
| G6401  | StTrGCl    | Cl + HCHO $\rightarrow$ HCl + CO + HO <sub>2</sub>                                                                   | 8.1E-11*EXP(-34./temp)                                 | Atkinson et al. (2006)                        |
| G6402  | StTrGCl    | Cl + CH <sub>3</sub> OOH $\rightarrow$ HCHO + HCl + OH                                                               | 5.9E-11                                                | Atkinson et al. (2006)*                       |
| G6403  | StTrGCl    | ClO + CH <sub>3</sub> O <sub>2</sub> $\rightarrow$ 1.0 o3lossro + LossO3Cl + 1. LossO3 + HO <sub>2</sub> + Cl + HCHO | 3.3E-12*EXP(-115./temp)                                | Sander et al. (2011)                          |
| G6404  | StGCl      | CCl <sub>4</sub> + O( <sup>1</sup> D) $\rightarrow$ 4.0 ProdLCl + ClO + 3 Cl                                         | 3.3E-10                                                | Sander et al. (2011)                          |
| G6405  | StGCl      | CH <sub>3</sub> Cl + O( <sup>1</sup> D) $\rightarrow$ 1.0 o3lossxo + 1.0 ProdLCl + LossO3Cl + 1. LossO3 + OH + Cl    | 1.65E-10                                               | see note*                                     |
| G6406  | StGCl      | CH <sub>3</sub> Cl + OH $\rightarrow$ 1.0 ProdLCl + H <sub>2</sub> O + Cl                                            | 2.4E-12*EXP(-1250./temp)                               | Sander et al. (2011)                          |

Table 1: Gas phase reactions (... continued)

| #      | labels   | reaction                                                                                                                                                                      | rate coefficient                                                                                                                                                          | reference                                              |
|--------|----------|-------------------------------------------------------------------------------------------------------------------------------------------------------------------------------|---------------------------------------------------------------------------------------------------------------------------------------------------------------------------|--------------------------------------------------------|
| G6407  | StGCCl   | $\text{CH}_3\text{CCl}_3 + \text{O}(^1\text{D}) \rightarrow 1.0 \text{ o3lossxo} + 3.0 \text{ ProdLCl} +$<br>$\text{LossO3Cl} + 1. \text{ LossO3} + \text{OH} + 3 \text{ Cl}$ | 3.E-10                                                                                                                                                                    | see note*                                              |
| G6408  | StTrGCCl | $\text{CH}_3\text{CCl}_3 + \text{OH} \rightarrow 3.0 \text{ ProdLCl} + \text{H}_2\text{O} + 3 \text{ Cl}$                                                                     | $1.64\text{E-}12 \cdot \text{EXP}(-1520./\text{temp})$                                                                                                                    | Sander et al. (2011)                                   |
| G6409a | TrGCCl   | $\text{Cl} + \text{C}_2\text{H}_4 \rightarrow .6666667 \text{ CH}_3\text{CH}(\text{O}_2)\text{CH}_2\text{OH} + \text{HCl}$                                                    | $\text{k\_3rd\_iupac}(\text{temp}, \text{cair}, 1.85\text{E-}29, 3.3,$<br>$6.0\text{E-}10, 0.0, 0.4)$                                                                     | Atkinson et al. (2006)                                 |
| G6410  | TrGCCl   | $\text{Cl} + \text{CH}_3\text{CHO} \rightarrow \text{HCl} + \text{CH}_3\text{C}(\text{O})\text{OO}$                                                                           | $8.0\text{e-}11$                                                                                                                                                          | Atkinson et al. (2006)                                 |
| G6500  | StGFCl   | $\text{CF}_2\text{Cl}_2 + \text{O}(^1\text{D}) \rightarrow 2.0 \text{ ProdLCl} + \text{ClO} + \text{Cl}$                                                                      | $1.4\text{E-}10$                                                                                                                                                          | Sander et al. (2011)                                   |
| G6501  | StGFCl   | $\text{CFCl}_3 + \text{O}(^1\text{D}) \rightarrow 3.0 \text{ ProdLCl} + \text{ClO} + 2 \text{ Cl}$                                                                            | $2.3\text{E-}10$                                                                                                                                                          | Sander et al. (2011)                                   |
| G7100  | StTrGBr  | $\text{Br} + \text{O}_3 \rightarrow \text{BrO} + \text{O}_2$                                                                                                                  | $1.7\text{E-}11 \cdot \text{EXP}(-800./\text{temp})$                                                                                                                      | Atkinson et al. (2007)                                 |
| G7101  | StGBr    | $\text{BrO} + \text{O}(^3\text{P}) \rightarrow 2.0 \text{ LossO3Br} + 2. \text{ LossO3} + \text{Br} + \text{O}_2$                                                             | $1.9\text{E-}11 \cdot \text{EXP}(230./\text{temp})$                                                                                                                       | Atkinson et al. (2007)                                 |
| G7102a | StTrGBr  | $\text{BrO} + \text{BrO} \rightarrow 2.0 \text{ LossO3Br} + 2. \text{ LossO3} + 2 \text{ Br} + \text{O}_2$                                                                    | $2.7\text{E-}12$                                                                                                                                                          | Atkinson et al. (2007)                                 |
| G7102b | StTrGBr  | $\text{BrO} + \text{BrO} \rightarrow 2.0 \text{ LossO3Br} + 2. \text{ LossO3} + \text{Br}_2 + \text{O}_2$                                                                     | $2.9\text{E-}14 \cdot \text{EXP}(840./\text{temp})$                                                                                                                       | Atkinson et al. (2007)                                 |
| G7200  | StTrGBr  | $\text{Br} + \text{HO}_2 \rightarrow \text{HBr} + \text{O}_2$                                                                                                                 | $7.7\text{E-}12 \cdot \text{EXP}(-450./\text{temp})$                                                                                                                      | Atkinson et al. (2007)                                 |
| G7201  | StTrGBr  | $\text{BrO} + \text{HO}_2 \rightarrow \text{HOBr} + \text{O}_2$                                                                                                               | $4.5\text{E-}12 \cdot \text{EXP}(500./\text{temp})$                                                                                                                       | Atkinson et al. (2007)                                 |
| G7202  | StTrGBr  | $\text{HBr} + \text{OH} \rightarrow \text{Br} + \text{H}_2\text{O}$                                                                                                           | $6.7\text{E-}12 \cdot \text{EXP}(155./\text{temp})$                                                                                                                       | Atkinson et al. (2007)                                 |
| G7203  | StGBr    | $\text{HOBr} + \text{O}(^3\text{P}) \rightarrow \text{LossO3Br} + 1. \text{ LossO3} + \text{OH} + \text{BrO}$                                                                 | $1.2\text{E-}10 \cdot \text{EXP}(-430./\text{temp})$                                                                                                                      | Atkinson et al. (2007)                                 |
| G7204  | StTrGBr  | $\text{Br}_2 + \text{OH} \rightarrow 1. \text{ ProdO3} + \text{HOBr} + \text{Br}$                                                                                             | $2.0\text{E-}11 \cdot \text{EXP}(240./\text{temp})$                                                                                                                       | Atkinson et al. (2007)                                 |
| G7300  | TrGNBr   | $\text{Br} + \text{BrNO}_3 \rightarrow \text{Br}_2 + \text{NO}_3$                                                                                                             | $4.9\text{E-}11$                                                                                                                                                          | Orlando and Tyndall (1996)                             |
| G7301  | StTrGNBr | $\text{BrO} + \text{NO} \rightarrow \text{LossO3Br} + \text{LossO3Nn} + \text{Br} + \text{NO}_2$                                                                              | $8.7\text{E-}12 \cdot \text{EXP}(260./\text{temp})$                                                                                                                       | Atkinson et al. (2007)                                 |
| G7302  | StTrGNBr | $\text{BrO} + \text{NO}_2 \rightarrow \text{BrNO}_3$                                                                                                                          | $\text{k\_BrO\_NO2}$                                                                                                                                                      | Atkinson et al. (2007)*                                |
| G7303  | TrGNBr   | $\text{BrNO}_3 \rightarrow \text{BrO} + \text{NO}_2$                                                                                                                          | $\text{k\_BrO\_NO2}/(5.44\text{E-}9 \cdot \text{EXP}(14192./\text{temp})$<br>$\cdot 1.\text{E6} \cdot \text{R\_gas} \cdot \text{temp}/(\text{atm2Pa} \cdot \text{N\_A}))$ | Orlando and Tyndall (1996),<br>Atkinson et al. (2007)* |
| G7400  | StTrGBr  | $\text{Br} + \text{HCHO} \rightarrow \text{HBr} + \text{CO} + \text{HO}_2$                                                                                                    | $7.7\text{E-}12 \cdot \text{EXP}(-580./\text{temp})$                                                                                                                      | Atkinson et al. (2006)                                 |
| G7401  | TrGBr    | $\text{Br} + \text{CH}_3\text{OOH} \rightarrow \text{CH}_3\text{O}_2 + \text{HBr}$                                                                                            | $2.6\text{E-}12 \cdot \text{EXP}(-1600./\text{temp})$                                                                                                                     | Kondo and Benson (1984)                                |
| G7402a | TrGBr    | $\text{BrO} + \text{CH}_3\text{O}_2 \rightarrow \text{HOBr} + \text{HCHO}$                                                                                                    | $\text{G7402a\_yield} \cdot 5.7\text{E-}12$                                                                                                                               | Aranda et al. (1997)                                   |
| G7402b | TrGBr    | $\text{BrO} + \text{CH}_3\text{O}_2 \rightarrow 1.0 \text{ o3lossro} + \text{LossO3Br} + 1. \text{ LossO3} +$<br>$\text{Br} + \text{HCHO} + \text{HO}_2$                      | $(1.-\text{G7402a\_yield}) \cdot 5.7\text{E-}12$                                                                                                                          | Aranda et al. (1997)                                   |
| G7403  | StTrGBr  | $\text{CH}_3\text{Br} + \text{OH} \rightarrow 1.0 \text{ ProdLBr} + \text{H}_2\text{O} + \text{Br}$                                                                           | $2.35\text{E-}12 \cdot \text{EXP}(-1300./\text{temp})$                                                                                                                    | Sander et al. (2011)                                   |
| G7404a | TrGCB    | $\text{Br} + \text{C}_2\text{H}_4 \rightarrow .6666667 \text{ CH}_3\text{CH}(\text{O}_2)\text{CH}_2\text{OH} + \text{HBr}$                                                    | $2.8\text{E-}13 \cdot \text{EXP}(224./\text{temp})/(1.+$<br>$1.13\text{E}24 \cdot \text{EXP}(-3200./\text{temp})/\text{C}(\text{ind\_02}))$                               | Atkinson et al. (2006)                                 |
| G7405  | TrGCB    | $\text{Br} + \text{CH}_3\text{CHO} \rightarrow \text{HBr} + \text{CH}_3\text{C}(\text{O})\text{OO}$                                                                           | $1.8\text{e-}11 \cdot \text{EXP}(-460./\text{temp})$                                                                                                                      | Atkinson et al. (2006)                                 |
| G7407  | TrGBr    | $\text{CHBr}_3 + \text{OH} \rightarrow 3.0 \text{ ProdSBr} + \text{H}_2\text{O} + 3 \text{ Br}$                                                                               | $1.35\text{E-}12 \cdot \text{EXP}(-600./\text{temp})$                                                                                                                     | Sander et al. (2011)*                                  |
| G7408  | TrGBr    | $\text{CH}_2\text{Br}_2 + \text{OH} \rightarrow 2.0 \text{ ProdSBr} + \text{H}_2\text{O} + 2 \text{ Br}$                                                                      | $2.0\text{E-}12 \cdot \text{EXP}(-840./\text{temp})$                                                                                                                      | Sander et al. (2011)*                                  |
| G7600  | TrGClBr  | $\text{Br} + \text{BrCl} \rightarrow \text{Br}_2 + \text{Cl}$                                                                                                                 | $3.32\text{E-}15$                                                                                                                                                         | Manion et al. (2010)                                   |
| G7601  | TrGClBr  | $\text{Br} + \text{Cl}_2 \rightarrow \text{BrCl} + \text{Cl}$                                                                                                                 | $1.10\text{E-}15$                                                                                                                                                         | Dolson and Leone (1987)                                |

Table 1: Gas phase reactions (... continued)

| #       | labels    | reaction                                                                                                                                                                    | rate coefficient                                                                        | reference                    |
|---------|-----------|-----------------------------------------------------------------------------------------------------------------------------------------------------------------------------|-----------------------------------------------------------------------------------------|------------------------------|
| G7602   | TrGClBr   | $\text{Br}_2 + \text{Cl} \rightarrow \text{BrCl} + \text{Br}$                                                                                                               | $2.3\text{E}-10 \cdot \text{EXP}(135./\text{temp})$                                     | Bedjanian et al. (1998)      |
| G7603a  | StTrGClBr | $\text{BrO} + \text{ClO} \rightarrow 1. \text{ LossO3} + \text{Br} + \text{OClO}$                                                                                           | $1.6\text{E}-12 \cdot \text{EXP}(430./\text{temp})$                                     | Atkinson et al. (2007)       |
| G7603b  | StTrGClBr | $\text{BrO} + \text{ClO} \rightarrow \text{LossO3Br} + \text{LossO3Cl} + 2. \text{ LossO3} + \text{Br}$<br>$+ \text{Cl} + \text{O}_2$                                       | $2.9\text{E}-12 \cdot \text{EXP}(220./\text{temp})$                                     | Atkinson et al. (2007)       |
| G7603c  | StTrGClBr | $\text{BrO} + \text{ClO} \rightarrow \text{LossO3Br} + \text{LossO3Cl} + 2. \text{ LossO3} + \text{BrCl}$<br>$+ \text{O}_2$                                                 | $5.8\text{E}-13 \cdot \text{EXP}(170./\text{temp})$                                     | Atkinson et al. (2007)       |
| G7604   | TrGClBr   | $\text{BrCl} + \text{Cl} \rightarrow \text{Br} + \text{Cl}_2$                                                                                                               | $1.45\text{E}-11$                                                                       | Clyne and Cruse (1972)       |
| G7605   | TrGClBr   | $\text{CHCl}_2\text{Br} + \text{OH} \rightarrow 1.0 \text{ ProdSBr} + \text{H}_2\text{O} + \text{Br}$                                                                       | $2.0\text{E}-12 \cdot \text{EXP}(-840./\text{temp})$                                    | see note*                    |
| G7606   | TrGClBr   | $\text{CHClBr}_2 + \text{OH} \rightarrow 2.0 \text{ ProdSBr} + \text{H}_2\text{O} + 2 \text{ Br}$                                                                           | $2.0\text{E}-12 \cdot \text{EXP}(-840./\text{temp})$                                    | see note*                    |
| G7607   | TrGClBr   | $\text{CH}_2\text{ClBr} + \text{OH} \rightarrow 1.0 \text{ ProdSBr} + \text{H}_2\text{O} + \text{Br}$                                                                       | $2.4\text{E}-12 \cdot \text{EXP}(-920./\text{temp})$                                    | Sander et al. (2011)*        |
| G9200   | StTrGS    | $\text{SO}_2 + \text{OH} \rightarrow 1. \text{ LossO3} + \text{H}_2\text{SO}_4 + \text{HO}_2$                                                                               | $\text{k\_3rd}(\text{temp}, \text{cair}, 3.3\text{E}-31, 4.3, 1.6\text{E}-12, 0., 0.6)$ | Sander et al. (2011)         |
| G9400a  | TrGS      | $\text{DMS} + \text{OH} \rightarrow \text{CH}_3\text{SO}_2 + \text{HCHO}$                                                                                                   | $1.13\text{E}-11 \cdot \text{EXP}(-253./\text{temp})$                                   | Atkinson et al. (2004)*      |
| G9400b  | TrGS      | $\text{DMS} + \text{OH} \rightarrow \text{DMSO} + \text{HO}_2$                                                                                                              | $\text{k\_DMS\_OH}$                                                                     | Atkinson et al. (2004)*      |
| G9401   | TrGNS     | $\text{DMS} + \text{NO}_3 \rightarrow 1.0 \text{ o3lossro} + 1. \text{ LossO3} + \text{CH}_3\text{SO}_2 + \text{HNO}_3 + \text{HCHO}$                                       | $1.9\text{E}-13 \cdot \text{EXP}(520./\text{temp})$                                     | Atkinson et al. (2004)       |
| G9402   | TrGS      | $\text{DMSO} + \text{OH} \rightarrow 0.6 \text{ ProdO3} + .6 \text{ SO}_2 + \text{HCHO} + .6 \text{ CH}_3\text{O}_2 + .4 \text{ HO}_2 + .4 \text{ CH}_3\text{SO}_3\text{H}$ | $1.\text{E}-10$                                                                         | Hynes and Wine (1996)        |
| G9403   | TrGS      | $\text{CH}_3\text{SO}_2 \rightarrow 1. \text{ ProdO3} + \text{SO}_2 + \text{CH}_3\text{O}_2$                                                                                | $1.8\text{E}13 \cdot \text{EXP}(-8661./\text{temp})$                                    | Barone et al. (1995)         |
| G9404   | TrGS      | $\text{CH}_3\text{SO}_2 + \text{O}_3 \rightarrow 1.0 \text{ o3lossxo} + 1. \text{ LossO3} + \text{CH}_3\text{SO}_3$                                                         | $3.\text{E}-13$                                                                         | Barone et al. (1995)         |
| G9405   | TrGS      | $\text{CH}_3\text{SO}_3 + \text{HO}_2 \rightarrow \text{CH}_3\text{SO}_3\text{H}$                                                                                           | $5.\text{E}-11$                                                                         | Barone et al. (1995)         |
| G9600   | TrGScl    | $\text{DMS} + \text{Cl} \rightarrow \text{CH}_3\text{SO}_2 + \text{HCl} + \text{HCHO}$                                                                                      | $3.3\text{E}-10$                                                                        | Atkinson et al. (2004)       |
| G9700   | TrGSBr    | $\text{DMS} + \text{Br} \rightarrow \text{CH}_3\text{SO}_2 + \text{HBr} + \text{HCHO}$                                                                                      | $9.\text{E}-11 \cdot \text{EXP}(-2386./\text{temp})$                                    | Jefferson et al. (1994)      |
| G9701   | TrGSBr    | $\text{DMS} + \text{BrO} \rightarrow 1. \text{ LossO3} + \text{DMSO} + \text{Br}$                                                                                           | $4.4\text{E}-13$                                                                        | Ingham et al. (1999)         |
| G01Diag | StTrG     | $\text{O}_3(\text{s}) \rightarrow \text{LO}_3(\text{s})$                                                                                                                    | $\text{k\_O3s}$                                                                         | Roelofs and Lelieveld (1997) |

## General notes

### Three-body reactions

Rate coefficients for three-body reactions are defined via the function `k_3rd`( $T$ ,  $M$ ,  $k_0^{300}$ ,  $n$ ,  $k_{\text{inf}}^{300}$ ,  $m$ ,  $f_c$ ). In the code, the temperature  $T$  is called `temp` and the concentration of “air molecules”  $M$  is called `cair`. Using the auxiliary variables  $k_0(T)$ ,  $k_{\text{inf}}(T)$ , and  $k_{\text{ratio}}$ , `k_3rd` is defined as:

$$k_0(T) = k_0^{300} \times \left(\frac{300\text{K}}{T}\right)^n \quad (1)$$

$$k_{\text{inf}}(T) = k_{\text{inf}}^{300} \times \left(\frac{300\text{K}}{T}\right)^m \quad (2)$$

$$k_{\text{ratio}} = \frac{k_0(T)M}{k_{\text{inf}}(T)} \quad (3)$$

$$\text{k\_3rd} = \frac{k_0(T)M}{1 + k_{\text{ratio}}} \times f_c \left( \frac{1}{1 + (\log_{10}(k_{\text{ratio}}))^2} \right) \quad (4)$$

A similar function, called `k_3rd_iupac` here, is used by T. J. Wallington et al. (2014) for three-body reactions. It has the same function parameters as `k_3rd` and it is defined as:

$$k_0(T) = k_0^{300} \times \left(\frac{300\text{K}}{T}\right)^n \quad (5)$$

$$k_{\text{inf}}(T) = k_{\text{inf}}^{300} \times \left(\frac{300\text{K}}{T}\right)^m \quad (6)$$

$$k_{\text{ratio}} = \frac{k_0(T)M}{k_{\text{inf}}(T)} \quad (7)$$

$$N = 0.75 - 1.27 \times \log_{10}(f_c) \quad (8)$$

$$\text{k\_3rd\_iupac} = \frac{k_0(T)M}{1 + k_{\text{ratio}}} \times f_c \left( \frac{1}{1 + (\log_{10}(k_{\text{ratio}})/N)^2} \right) \quad (9)$$

### RO<sub>2</sub> self and cross reactions

The self and cross reactions of organic peroxy radicals are treated according to the permutation reaction formalism as implemented in the MCM (Rickard and Pascoe, 2009). Every organic peroxy radical reacts in a pseudo-first-order reaction with a rate constant that is expressed as  $k^{\text{1st}} = 2 \times \sqrt{k_{\text{self}} \times \text{k\_CH302}} \times [\text{RO}_2]$  where  $k_{\text{self}}$  = second-order rate coefficient of the self reaction of the organic peroxy radical, `k_CH302` = second-order rate coefficient of the self reaction of  $\text{CH}_3\text{O}_2$ , and  $[\text{RO}_2]$  = sum of the concentrations of all organic peroxy radicals.

### Specific notes

G1002a: The path leading to  $2 \text{ O}(^3\text{P}) + \text{O}_2$  results in a null cycle regarding odd oxygen and is neglected.

G2110: The rate coefficient is: `k_HO2_HO2 = (1.5E-12*EXP(19./temp)+1.7E-33*EXP(1000./temp)*cair)*(1.+1.4E-21*EXP(2200./temp)*C(ind_H20))`. The value for the first (pressure-independent) part is from Christensen et al. (2002), the water term from Kircher and Sander (1984).

G3109: The rate coefficient is: `k_NO3_NO2 = k_3rd(temp, cair, 2.E-30, 4.4, 1.4E-12, 0.7, 0.6)`.

G3110: The rate coefficient is defined as backward reaction divided by equilibrium constant.

G3203: The rate coefficient is: `k_NO2_HO2 = k_3rd(temp, cair, 1.8E-31, 3.2, 4.7E-12, 1.4, 0.6)`.

G3206: The rate coefficient is: `k_HNO3_OH = 2.4E-14 * EXP(460./temp) + 1./ ( 1./ (6.5E-34 * EXP(1335./temp)*cair) + 1./ (2.7E-17 * EXP(2199./temp)) )`

G3207: The rate coefficient is defined as backward reaction divided by equilibrium constant.

G4103: Sander et al. (2006) recommend a zero product yield for  $\text{HCHO}$ .

G4109: The same temperature dependence assumed as for  $\text{CH}_3\text{CHO} + \text{NO}_3$ . At 298 K,  $k = 5.8 \times 10^{-16}$ .

G4201: The product distribution is from Rickard and Pascoe (2009), after substitution of the Criegee intermediate by its decomposition products.

G4206: The product  $\text{C}_2\text{H}_5\text{OH}$ , which reacts only with OH, is substituted by its degradation products  $\approx 0.1 \text{ HOCH}_2\text{CH}_2\text{O}_2 + 0.9 \text{ CH}_3\text{CHO} + 0.9 \text{ HO}_2$ .

G4207: Same value as for G4107

G4213: The rate coefficient is: `k_CH3CO3_NO2 = k_3rd(temp, cair, 9.7E-29, 5.6, 9.3E-12, 1.5, 0.6)`.

G4221: The rate coefficient `isk_PAN_M = k_CH3CO3_NO2/9.E-29*EXP(-14000./temp)`, i.e. the rate coefficient is defined as backward reaction divided by equilibrium constant.

G4307: Same value as for G4107

G4315: Same value as for G4107

G4401: Same value as for G4306

G4402: Same value as for G4304

G4403: Same value as for G4305

G4404: Same value as for G4107

G4414: Same value as for G4304

G4415: Same value as for G4305

G4416: Same value as for G4107

G4419: Same value as for G4221

G6103: The rate coefficient is defined as backward reaction divided by equilibrium constant.

G6204: At low temperatures, there may be a minor reaction channel leading to  $\text{O}_3 + \text{HCl}$ . See Finkbeiner et al. (1995) for details. It is neglected here.

**G6402:** The initial products are probably HCl and CH<sub>2</sub>OOH (Atkinson et al., 2006). It is assumed that CH<sub>2</sub>OOH dissociates into HCHO and OH.

**G6405:** Average of reactions with CH<sub>3</sub>Br and CH<sub>3</sub>F from Sander et al. (2006) (B. Steil, pers. comm.).

**G6407:** Rough extrapolation from reactions with CH<sub>3</sub>CF<sub>3</sub>, CH<sub>3</sub>CClF<sub>2</sub>, and CH<sub>3</sub>CCl<sub>2</sub>F from Sander et al. (2006).

**G7302:** The rate coefficient is:  $k_{\text{BrO}_2\text{NO}_2} = k_{\text{3rd}}(\text{temp}, \text{cair}, 5.2\text{E-}31, 3.2, 6.9\text{E-}12, 2.9, 0.6)$ .

**G7303:** The rate coefficient is defined as backward reaction (Atkinson et al., 2007) divided by equilibrium constant (Orlando and Tyndall, 1996).

**G7407:** It is assumed that the reaction liberates all Br atoms. The fate of the carbon atom is currently not considered.

**G7408:** It is assumed that the reaction liberates all Br atoms. The fate of the carbon atom is currently not

considered.

**G7605:** Same value as for G7408: CH<sub>2</sub>Br<sub>2</sub>+OH assumed. It is assumed that the reaction liberates all Br atoms but not Cl. The fate of the carbon atom is currently not considered.

**G7606:** Same value as for G7408: CH<sub>2</sub>Br<sub>2</sub>+OH assumed. It is assumed that the reaction liberates all Br atoms but not Cl. The fate of the carbon atom is currently not considered.

**G7607:** It is assumed that the reaction liberates all Br atoms but not Cl. The fate of the carbon atom is currently not considered.

**G9400a:** For the abstraction path, the assumed reaction sequence (omitting H<sub>2</sub>O and O<sub>2</sub> as products) according to Yin et al. (1990) is:

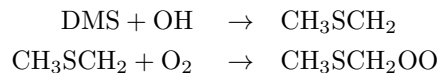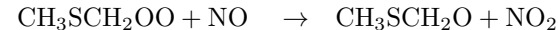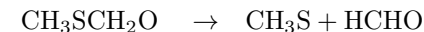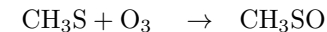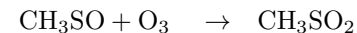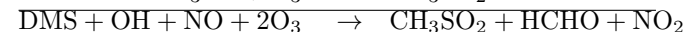

Neglecting the effect on O<sub>3</sub> and NO<sub>x</sub>, the remaining reaction is:

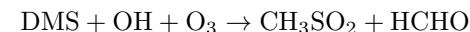

**G9400b:** For the addition path, the rate coefficient is:  $k_{\text{DMS}_\text{OH}} = 1.0\text{E-}39 * \text{EXP}(5820./\text{temp}) * \text{C}(\text{ind}_2) / (1.+5.0\text{E-}30 * \text{EXP}(6280./\text{temp}) * \text{C}(\text{ind}_2))$ .

Table 2: Photolysis reactions

| #      | labels    | reaction                                                                                                                                               | rate coefficient     | reference                   |
|--------|-----------|--------------------------------------------------------------------------------------------------------------------------------------------------------|----------------------|-----------------------------|
| J1000a | UpStTrGJ  | $O_2 + h\nu \rightarrow o3prodo2 + 2. \text{ ProdO3} + O(^3P) + O(^3P)$                                                                                | jx(ip_02)            | Sander et al. (2014)        |
| J1001a | UpStTrGJ  | $O_3 + h\nu \rightarrow O(^1D) + O_2$                                                                                                                  | jx(ip_01D)           | Sander et al. (2014)        |
| J1001b | UpStTrGJ  | $O_3 + h\nu \rightarrow O(^3P) + O_2$                                                                                                                  | jx(ip_03P)           | Sander et al. (2014)        |
| J2100a | UpStGJ    | $H_2O + h\nu \rightarrow H + OH$                                                                                                                       | jx(ip_H20)           | Sander et al. (2014)        |
| J2101  | UpStTrGJ  | $H_2O_2 + h\nu \rightarrow 2 \text{ OH}$                                                                                                               | jx(ip_H202)          | Sander et al. (2014)        |
| J3100  | UpStGNJ   | $N_2O + h\nu \rightarrow 1.0 \text{ o3prodh2} + 1. \text{ ProdO3} + O(^1D) + N_2$                                                                      | jx(ip_N20)           | Sander et al. (2014)        |
| J3101  | UpStTrGNJ | $NO_2 + h\nu \rightarrow 1.0 \text{ LossJ3101} + NO + O(^3P)$                                                                                          | jx(ip_N02)           | Sander et al. (2014)        |
| J3102a | UpStGNJ   | $NO + h\nu \rightarrow 1. \text{ ProdO3} + N + O(^3P)$                                                                                                 | jx(ip_N0)            | Sander et al. (2014)        |
| J3103a | UpStTrGNJ | $NO_3 + h\nu \rightarrow 1.0 \text{ LossJ3103a} + NO_2 + O(^3P)$                                                                                       | jx(ip_N020)          | Sander et al. (2014)        |
| J3103b | UpStTrGNJ | $NO_3 + h\nu \rightarrow 2.0 \text{ LossO3N} + 2. \text{ LossO3} + NO + O_2$                                                                           | jx(ip_N002)          | Sander et al. (2014)        |
| J3104  | StTrGNJ   | $N_2O_5 + h\nu \rightarrow NO_2 + NO_3$                                                                                                                | jx(ip_N205)          | Sander et al. (2014)        |
| J3200  | TrGNJ     | $HONO + h\nu \rightarrow NO + OH$                                                                                                                      | jx(ip_HONO)          | Sander et al. (2014)        |
| J3201  | StTrGNJ   | $HNO_3 + h\nu \rightarrow NO_2 + OH$                                                                                                                   | jx(ip_HNO3)          | Sander et al. (2014)        |
| J3202  | StTrGNJ   | $HNO_4 + h\nu \rightarrow 0.333 \text{ o3prodh2} + 0.333 \text{ ProdO3} + .667 \text{ NO}_2 + .667 \text{ HO}_2 + .333 \text{ NO}_3 + .333 \text{ OH}$ | jx(ip_HNO4)          | Sander et al. (2014)        |
| J4100  | StTrGJ    | $CH_3OOH + h\nu \rightarrow HCHO + OH + HO_2$                                                                                                          | jx(ip_CH300H)        | Sander et al. (2014)        |
| J4101a | StTrGJ    | $HCHO + h\nu \rightarrow H_2 + CO$                                                                                                                     | jx(ip_COH2)          | Sander et al. (2014)        |
| J4101b | StTrGJ    | $HCHO + h\nu \rightarrow H + CO + HO_2$                                                                                                                | jx(ip_CHOH)          | Sander et al. (2014)        |
| J4102  | StGJ      | $CO_2 + h\nu \rightarrow 1. \text{ ProdO3} + CO + O(^3P)$                                                                                              | jx(ip_CO2)           | Sander et al. (2014)        |
| J4103  | StGJ      | $CH_4 + h\nu \rightarrow CO + 0.31 \text{ H} + 0.69 \text{ H}_2 + 1.155 \text{ H}_2O$                                                                  | jx(ip_CH4)           | Sander et al. (2014)        |
| J4200  | TrGCJ     | $C_2H_5OOH + h\nu \rightarrow CH_3CHO + HO_2 + OH$                                                                                                     | jx(ip_CH300H)        | von Kuhlmann (2001)         |
| J4201  | TrGCJ     | $CH_3CHO + h\nu \rightarrow CH_3O_2 + HO_2 + CO$                                                                                                       | jx(ip_CH3CHO)        | Sander et al. (2014)        |
| J4202  | TrGCJ     | $CH_3C(O)OOH + h\nu \rightarrow CH_3O_2 + OH + CO_2$                                                                                                   | jx(ip_CH3CO3H)       | Sander et al. (2014)        |
| J4203  | TrGNJCJ   | $NACA + h\nu \rightarrow NO_2 + HCHO + CO$                                                                                                             | $0.19*jx(ip\_CHOH)$  | von Kuhlmann (2001)         |
| J4204  | TrGNJCJ   | $PAN + h\nu \rightarrow CH_3C(O)OO + NO_2$                                                                                                             | jx(ip_PAN)           | Sander et al. (2014)        |
| J4300  | TrGCJ     | $iC_3H_7OOH + h\nu \rightarrow CH_3COCH_3 + HO_2 + OH$                                                                                                 | jx(ip_CH300H)        | von Kuhlmann (2001)         |
| J4301  | TrGCJ     | $CH_3COCH_3 + h\nu \rightarrow CH_3C(O)OO + CH_3O_2$                                                                                                   | jx(ip_CH3COCH3)      | Sander et al. (2014)        |
| J4302  | TrGCJ     | $CH_3COCH_2OH + h\nu \rightarrow CH_3C(O)OO + HCHO + HO_2$                                                                                             | $0.074*jx(ip\_CHOH)$ | see note*                   |
| J4303  | TrGCJ     | $MGLYOX + h\nu \rightarrow CH_3C(O)OO + CO + HO_2$                                                                                                     | jx(ip_MGLYOX)        | Sander et al. (2014)        |
| J4304  | TrGCJ     | $CH_3COCH_2O_2H + h\nu \rightarrow CH_3C(O)OO + HCHO + OH$                                                                                             | jx(ip_CH300H)        | see note*                   |
| J4306  | TrGNJCJ   | $iC_3H_7ONO_2 + h\nu \rightarrow CH_3COCH_3 + NO_2 + HO_2$                                                                                             | $3.7*jx(ip\_PAN)$    | von Kuhlmann et al. (2003)* |
| J4400  | TrGCJ     | $LC_4H_9OOH + h\nu \rightarrow OH + .67 \text{ MEK} + .67 \text{ HO}_2 + .33 \text{ C}_2\text{H}_5\text{O}_2 + .33 \text{ CH}_3\text{CHO}$             | jx(ip_CH300H)        | Rickard and Pascoe (2009)   |

Table 2: Photolysis reactions (... continued)

| #      | labels     | reaction                                                                                                                                                                                                       | rate coefficient                                                                    | reference                  |
|--------|------------|----------------------------------------------------------------------------------------------------------------------------------------------------------------------------------------------------------------|-------------------------------------------------------------------------------------|----------------------------|
| J4401  | TrGCJ      | $\text{MVK} + h\nu \rightarrow \text{CH}_3\text{C}(\text{O})\text{OO} + \text{HCHO} + \text{CO} + \text{HO}_2$                                                                                                 | $0.019 \cdot \text{jx}(\text{ip\_COH2}) + 0.015 \cdot \text{jx}(\text{ip\_MGLYOX})$ | Sander et al. (2014)       |
| J4402  | TrGCJ      | $\text{MVKOOH} + h\nu \rightarrow \text{OH} + .5 \text{ MGLYOX} + .25 \text{ CH}_3\text{COCH}_2\text{OH} + .75 \text{ HCHO} + .75 \text{ HO}_2 + .25 \text{ CH}_3\text{C}(\text{O})\text{OO} + .25 \text{ CO}$ | $\text{jx}(\text{ip\_CH300H})$                                                      | see note*                  |
| J4403  | TrGCJ      | $\text{MEK} + h\nu \rightarrow \text{CH}_3\text{C}(\text{O})\text{OO} + \text{C}_2\text{H}_5\text{O}_2$                                                                                                        | $0.42 \cdot \text{jx}(\text{ip\_CHOH})$                                             | von Kuhlmann et al. (2003) |
| J4404  | TrGCJ      | $\text{LMEKOOH} + h\nu \rightarrow \text{CH}_3\text{C}(\text{O})\text{OO} + \text{CH}_3\text{CHO} + \text{OH}$                                                                                                 | $\text{jx}(\text{ip\_CH300H})$                                                      | Rickard and Pascoe (2009)  |
| J4405  | TrGCJ      | $\text{BIACET} + h\nu \rightarrow 2 \text{ CH}_3\text{C}(\text{O})\text{OO}$                                                                                                                                   | $2.15 \cdot \text{jx}(\text{ip\_MGLYOX})$                                           | see note*                  |
| J4406  | TrGN CJ    | $\text{LC4H9NO}_3 + h\nu \rightarrow \text{NO}_2 + .67 \text{ MEK} + .67 \text{ HO}_2 + .33 \text{ C}_2\text{H}_5\text{O}_2 + .33 \text{ CH}_3\text{CHO}$                                                      | $3.7 \cdot \text{jx}(\text{ip\_PAN})$                                               | von Kuhlmann (2001)        |
| J4407  | TrGN CJ    | $\text{MPAN} + h\nu \rightarrow \text{CH}_3\text{COCH}_2\text{OH} + \text{NO}_2$                                                                                                                               | $\text{jx}(\text{ip\_PAN})$                                                         | see note*                  |
| J4500  | TrGCJ      | $\text{ISOOH} + h\nu \rightarrow \text{MVK} + \text{HCHO} + \text{HO}_2 + \text{OH}$                                                                                                                           | $\text{jx}(\text{ip\_CH300H})$                                                      | see note*                  |
| J4501  | TrGN CJ    | $\text{ISON} + h\nu \rightarrow \text{MVK} + \text{HCHO} + \text{NO}_2 + \text{HO}_2$                                                                                                                          | $3.7 \cdot \text{jx}(\text{ip\_PAN})$                                               | von Kuhlmann (2001)        |
| J6000  | StTrGClJ   | $\text{Cl}_2 + h\nu \rightarrow \text{Cl} + \text{Cl}$                                                                                                                                                         | $\text{jx}(\text{ip\_Cl2})$                                                         | Sander et al. (2014)       |
| J6100  | StTrGClJ   | $\text{Cl}_2\text{O}_2 + h\nu \rightarrow 2. \text{ LossO}_3 + 2 \text{ Cl}$                                                                                                                                   | $\text{jx}(\text{ip\_Cl202})$                                                       | Sander et al. (2014)       |
| J6101  | StTrGClJ   | $\text{OCIO} + h\nu \rightarrow 1. \text{ ProdO}_3 + \text{ClO} + \text{O}(^3\text{P})$                                                                                                                        | $\text{jx}(\text{ip\_OC10})$                                                        | Sander et al. (2014)       |
| J6200  | StGClJ     | $\text{HCl} + h\nu \rightarrow \text{Cl} + \text{H}$                                                                                                                                                           | $\text{jx}(\text{ip\_HCl})$                                                         | Sander et al. (2014)       |
| J6201  | StTrGClJ   | $\text{HOCl} + h\nu \rightarrow \text{LossO}_3\text{Cl} + 1. \text{ LossO}_3 + \text{OH} + \text{Cl}$                                                                                                          | $\text{jx}(\text{ip\_HOC1})$                                                        | Sander et al. (2014)       |
| J6300  | TrGN ClJ   | $\text{ClNO}_2 + h\nu \rightarrow 1. \text{ ProdO}_3 + \text{Cl} + \text{NO}_2$                                                                                                                                | $\text{jx}(\text{ip\_ClNO2})$                                                       | Sander et al. (2014)       |
| J6301a | StTrGN ClJ | $\text{ClNO}_3 + h\nu \rightarrow \text{Cl} + \text{NO}_3$                                                                                                                                                     | $\text{jx}(\text{ip\_ClNO3})$                                                       | Sander et al. (2014)       |
| J6301b | StTrGN ClJ | $\text{ClNO}_3 + h\nu \rightarrow \text{ClO} + \text{NO}_2$                                                                                                                                                    | $\text{jx}(\text{ip\_ClON02})$                                                      | Sander et al. (2014)       |
| J6400  | StGClJ     | $\text{CH}_3\text{Cl} + h\nu \rightarrow 1.0 \text{ ProdLCl} + \text{Cl} + \text{CH}_3\text{O}_2$                                                                                                              | $\text{jx}(\text{ip\_CH3Cl})$                                                       | Sander et al. (2014)       |
| J6401  | StGClJ     | $\text{CCl}_4 + h\nu \rightarrow 4.0 \text{ ProdLCl} + 4 \text{ Cl}$                                                                                                                                           | $\text{jx}(\text{ip\_CC14})$                                                        | Sander et al. (2014)       |
| J6402  | StGCClJ    | $\text{CH}_3\text{CCl}_3 + h\nu \rightarrow 3.0 \text{ ProdLCl} + 3 \text{ Cl}$                                                                                                                                | $\text{jx}(\text{ip\_CH3CC13})$                                                     | Sander et al. (2014)       |
| J6500  | StGFClJ    | $\text{CFCl}_3 + h\nu \rightarrow 3.0 \text{ ProdLCl} + 3 \text{ Cl}$                                                                                                                                          | $\text{jx}(\text{ip\_CFC13})$                                                       | Sander et al. (2014)       |
| J6501  | StGFClJ    | $\text{CF}_2\text{Cl}_2 + h\nu \rightarrow 2.0 \text{ ProdLCl} + 2 \text{ Cl}$                                                                                                                                 | $\text{jx}(\text{ip\_CF2Cl2})$                                                      | Sander et al. (2014)       |
| J7000  | StTrGBrJ   | $\text{Br}_2 + h\nu \rightarrow \text{Br} + \text{Br}$                                                                                                                                                         | $\text{jx}(\text{ip\_Br2})$                                                         | Sander et al. (2014)       |
| J7100  | StTrGBrJ   | $\text{BrO} + h\nu \rightarrow \text{Br} + \text{O}(^3\text{P})$                                                                                                                                               | $\text{jx}(\text{ip\_Br0})$                                                         | Sander et al. (2014)       |
| J7200  | StTrGBrJ   | $\text{HOBr} + h\nu \rightarrow \text{LossO}_3\text{Br} + 1. \text{ LossO}_3 + \text{Br} + \text{OH}$                                                                                                          | $\text{jx}(\text{ip\_HOBr})$                                                        | Sander et al. (2014)       |
| J7300  | TrGNBrJ    | $\text{BrNO}_2 + h\nu \rightarrow 1. \text{ ProdO}_3 + \text{Br} + \text{NO}_2$                                                                                                                                | $\text{jx}(\text{ip\_BrNO2})$                                                       | Sander et al. (2014)       |
| J7301  | StTrGNBrJ  | $\text{BrNO}_3 + h\nu \rightarrow 0.85 \text{ Br} + 0.85 \text{ NO}_3 + 0.15 \text{ BrO} + 0.15 \text{ NO}_2$                                                                                                  | $\text{jx}(\text{ip\_BrNO3})$                                                       | Sander et al. (2014)*      |
| J7400  | StGBrJ     | $\text{CH}_3\text{Br} + h\nu \rightarrow 1.0 \text{ ProdLBr} + \text{Br} + \text{CH}_3\text{O}_2$                                                                                                              | $\text{jx}(\text{ip\_CH3Br})$                                                       | Sander et al. (2014)       |
| J7401  | TrGBrJ     | $\text{CH}_2\text{Br}_2 + h\nu \rightarrow 2.0 \text{ ProdSBr} + 2 \text{ Br}$                                                                                                                                 | $\text{jx}(\text{ip\_CH2Br2})$                                                      | Sander et al. (2014)       |
| J7402  | TrGBrJ     | $\text{CHBr}_3 + h\nu \rightarrow 3.0 \text{ ProdSBr} + 3 \text{ Br}$                                                                                                                                          | $\text{jx}(\text{ip\_CHBr3})$                                                       | Sander et al. (2014)       |
| J7500  | StGFBrJ    | $\text{CF}_3\text{Br} + h\nu \rightarrow 1.0 \text{ ProdLBr} + \text{Br}$                                                                                                                                      | $\text{jx}(\text{ip\_CF3Br})$                                                       | Sander et al. (2014)       |

Table 2: Photolysis reactions (... continued)

| #      | labels     | reaction                                                                                                         | rate coefficient         | reference            |
|--------|------------|------------------------------------------------------------------------------------------------------------------|--------------------------|----------------------|
| J7600  | StTrGClBrJ | $\text{BrCl} + h\nu \rightarrow \text{Br} + \text{Cl}$                                                           | $\text{jx(ip\_BrCl)}$    | Sander et al. (2014) |
| J7601  | StGFBrJ    | $\text{CF}_2\text{ClBr} + h\nu \rightarrow 1.0 \text{ ProdLBr} + 1.0 \text{ ProdLCl} + \text{Br} + \text{Cl}$    | $\text{jx(ip\_CF2ClBr)}$ | Sander et al. (2014) |
| J7602  | TrGClBrJ   | $\text{CH}_2\text{ClBr} + h\nu \rightarrow 1.0 \text{ ProdSBr} + 1.0 \text{ ProdSCl} + \text{Br} + \text{Cl}$    | $\text{jx(ip\_CH2ClBr)}$ | Sander et al. (2014) |
| J7603  | TrGClBrJ   | $\text{CHCl}_2\text{Br} + h\nu \rightarrow 1.0 \text{ ProdSBr} + 2.0 \text{ ProdSCl} + \text{Br} + 2 \text{ Cl}$ | $\text{jx(ip\_CHCl2Br)}$ | Sander et al. (2014) |
| J7604  | TrGClBrJ   | $\text{CHClBr}_2 + h\nu \rightarrow 2.0 \text{ ProdSBr} + 1.0 \text{ ProdSCl} + 2 \text{ Br} + \text{Cl}$        | $\text{jx(ip\_CHClBr2)}$ | Sander et al. (2014) |
| J8401a | TrGJ       | $\text{CH}_3\text{I} + h\nu \rightarrow \text{CH}_3\text{O}_2$                                                   | $\text{JX(ip\_CH3I)}$    | Sander et al. (2014) |

## General notes

J-values are calculated with an external module (e.g., JVAL) and then supplied to the MECCA chemistry.

Values that originate from the Master Chemical Mechanism (MCM) by Rickard and Pascoe (2009) are translated according in the following way:

$\text{J(11)} \rightarrow \text{jx(ip\_COH2)}$   
 $\text{J(12)} \rightarrow \text{jx(ip\_CHOH)}$   
 $\text{J(15)} \rightarrow \text{jx(ip\_HOCH2CHO)}$   
 $\text{J(18)} \rightarrow \text{jx(ip\_MACR)}$   
 $\text{J(22)} \rightarrow \text{jx(ip\_ACETOL)}$   
 $\text{J(23)+J(24)} \rightarrow \text{jx(ip\_MVK)}$   
 $\text{J(31)+J(32)+J(33)} \rightarrow \text{jx(ip\_GLYOX)}$   
 $\text{J(34)} \rightarrow \text{jx(ip\_MGLYOX)}$

$\text{J(41)} \rightarrow \text{jx(ip\_CH3OOH)}$   
 $\text{J(53)} \rightarrow \text{J(iC}_3\text{H}_7\text{ONO}_2)$   
 $\text{J(54)} \rightarrow \text{J(iC}_3\text{H}_7\text{ONO}_2)$   
 $\text{J(55)} \rightarrow \text{J(iC}_3\text{H}_7\text{ONO}_2)$   
 $\text{J(56)+J(57)} \rightarrow \text{jx(ip\_NOA)}$

## Specific notes

**J4302:** It is assumed that  $\text{J}(\text{CH}_3\text{COCH}_2\text{OH})$  is 0.074 times that of J4101b.

**J4304:** It is assumed that  $\text{J}(\text{CH}_3\text{COCH}_2\text{O}_2\text{H})$  is the same as  $\text{J}(\text{CH}_3\text{OOH})$ .

**J4306:** Following von Kuhlmann et al. (2003), we use  $\text{J}(\text{iC}_3\text{H}_7\text{ONO}_2) = 3.7 * \text{jx(ip\_PAN)}$ .

**J4402:** It is assumed that  $\text{J}(\text{MVKOOH})$  is the same as  $\text{J}(\text{CH}_3\text{OOH})$ .

**J4405:** It is assumed that  $\text{J}(\text{BIACET})$  is 2.15 times larger than  $\text{J}(\text{MGLYOX})$ , consistent with the photolysis rate coefficients used in the MCM (Rickard and Pascoe, 2009).

**J4407:** It is assumed that  $\text{J}(\text{MPAN})$  is the same as  $\text{J}(\text{PAN})$ .

**J4500:** It is assumed that  $\text{J}(\text{ISOOH})$  is the same as  $\text{J}(\text{CH}_3\text{OOH})$ .

**J7301:** The quantum yields are recommended by Sander et al. (2011) for  $\lambda > 300\text{nm}$  and used here for the entire spectrum.

Table 3: Henry’s law coefficients

| substance                                    | $\frac{k_H^\ominus}{\text{M/atm}}$   | $\frac{-\Delta_{\text{soln}}H/R}{\text{K}}$ | reference                       |
|----------------------------------------------|--------------------------------------|---------------------------------------------|---------------------------------|
| O <sub>2</sub>                               | $1.3 \times 10^{-3}$                 | 1500.                                       | Wilhelm et al. (1977)           |
| O <sub>3</sub>                               | $1.2 \times 10^{-2}$                 | 2560.                                       | Chameides (1984)                |
| OH                                           | $3.0 \times 10^1$                    | 4300.                                       | Hanson et al. (1992)            |
| HO <sub>2</sub>                              | $3.9 \times 10^3$                    | 5900.                                       | Hanson et al. (1992)            |
| H <sub>2</sub> O <sub>2</sub>                | $1. \times 10^5$                     | 6338.                                       | Lind and Kok (1994)             |
| H <sub>2</sub> O                             | BIG                                  | 0.                                          | see note                        |
| NH <sub>3</sub>                              | 58.                                  | 4085.                                       | Chameides (1984)                |
| NO                                           | $1.9 \times 10^{-3}$                 | 1480.                                       | Schwartz and White (1981)       |
| NO <sub>2</sub>                              | $7.0 \times 10^{-3}$                 | 2500.                                       | Lee and Schwartz (1981)*        |
| NO <sub>3</sub>                              | 2.                                   | 2000.                                       | Thomas et al. (1993)            |
| N <sub>2</sub> O <sub>5</sub>                | BIG                                  | 0.                                          | see note                        |
| HONO                                         | $4.9 \times 10^1$                    | 4780.                                       | Schwartz and White (1981)       |
| HNO <sub>3</sub>                             | $2.45 \times 10^6 / 1.5 \times 10^1$ | 8694.                                       | Brimblecombe and Clegg (1989)*  |
| HNO <sub>4</sub>                             | $1.2 \times 10^4$                    | 6900.                                       | Régimbal and Mozurkewich (1997) |
| CH <sub>3</sub> OH                           | $2.20 \times 10^2$                   | 5200.                                       | Snider and Dawson (1985)        |
| CH <sub>3</sub> O <sub>2</sub>               | 6.                                   | 5600.                                       | Jacob (1986)*                   |
| CH <sub>3</sub> OOH                          | $3.0 \times 10^2$                    | 5322.                                       | Lind and Kok (1994)             |
| CO <sub>2</sub>                              | $3.1 \times 10^{-2}$                 | 2423.                                       | Chameides (1984)                |
| HCHO                                         | $7.0 \times 10^3$                    | 6425.                                       | Chameides (1984)                |
| HCOOH                                        | $3.7 \times 10^3$                    | 5700.                                       | Chameides (1984)                |
| CH <sub>3</sub> COOH                         | $4.1 \times 10^3$                    | 6200.                                       | Sander et al. (2006)            |
| PAN                                          | 2.8                                  | 5730.                                       | Sander et al. (2006)            |
| C <sub>2</sub> H <sub>5</sub> O <sub>2</sub> | 6.                                   | 5600.                                       | see note                        |
| CH <sub>3</sub> CHO                          | $1.29 \times 10^1$                   | 5890.                                       | Sander et al. (2006)            |
| CH <sub>3</sub> COCH <sub>3</sub>            | 28.1                                 | 5050.                                       | Sander et al. (2006)            |
| MGLYOX                                       | $3.70 \times 10^3$                   | 7500.                                       | Betterton and Hoffmann (1988)   |
| Cl <sub>2</sub>                              | $9.2 \times 10^{-2}$                 | 2081.                                       | Bartlett and Margerum (1999)    |
| HCl                                          | 2./1.7                               | 9001.                                       | Brimblecombe and Clegg (1989)   |
| HOCl                                         | $6.7 \times 10^2$                    | 5862.                                       | Huthwelker et al. (1995)        |
| ClNO <sub>3</sub>                            | BIG                                  | 0.                                          | see note                        |
| Br <sub>2</sub>                              | $7.7 \times 10^{-1}$                 | 3837.                                       | Bartlett and Margerum (1999)    |
| HBr                                          | 1.3                                  | 10239.                                      | Brimblecombe and Clegg (1989)*  |
| HOBr                                         | $9.3 \times 10^1$                    | 5862.                                       | Vogt et al. (1996)*             |

Table 3: Henry’s law coefficients (... continued)

| substance                         | $\frac{k_H^\ominus}{\text{M/atm}}$ | $\frac{-\Delta_{\text{soln}}H/R}{\text{K}}$ | reference                     |
|-----------------------------------|------------------------------------|---------------------------------------------|-------------------------------|
| BrNO <sub>3</sub>                 | BIG                                | 0.                                          | see note                      |
| BrCl                              | $9.4 \times 10^{-1}$               | 5600.                                       | Bartlett and Margerum (1999)  |
| SO <sub>2</sub>                   | 1.2                                | 3120.                                       | Chameides (1984)              |
| H <sub>2</sub> SO <sub>4</sub>    | $1. \times 10^{11}$                | 0.                                          | see note                      |
| CH <sub>3</sub> SO <sub>3</sub> H | BIG                                | 0.                                          | see note                      |
| DMS                               | $5.4 \times 10^{-1}$               | 3500.                                       | Staudinger and Roberts (2001) |
| DMSO                              | $5. \times 10^4$                   | 6425.                                       | De Bruyn et al. (1994)*       |

## General notes

The value “BIG” corresponds to virtually infinite solubility which is represented in the model using a very large but arbitrary number.

The temperature dependence of the Henry constants is:

$$K_H = K_H^\ominus \times \exp \left( \frac{-\Delta_{\text{soln}}H}{R} \left( \frac{1}{T} - \frac{1}{T^\ominus} \right) \right)$$

where  $\Delta_{\text{soln}}H$  = molar enthalpy of dissolution [J/mol] and  $R = 8.314 \text{ J}/(\text{mol K})$ .

## Specific notes

NO<sub>2</sub>: The temperature dependence is from Chameides (1984).

HNO<sub>3</sub>: Calculated using the acidity constant from Davis and de Bruin (1964).

CH<sub>3</sub>O<sub>2</sub>: This value was estimated by Jacob (1986).

C<sub>2</sub>H<sub>5</sub>O<sub>2</sub>: Assumed to be the same as  $K_H(\text{CH}_3\text{O}_2)$ .

HBr: Calculated using the acidity constant from Lax (1969).

HOBr: This value was estimated by Vogt et al. (1996).

H<sub>2</sub>SO<sub>4</sub>: To account for the very high Henry’s law coefficient of H<sub>2</sub>SO<sub>4</sub>, a very high value was chosen arbitrarily.

DMSO: Lower limit cited from another reference.

Table 4: Accommodation coefficients

| substance                                    | $\alpha^\ominus$      | $\frac{-\Delta_{\text{obs}}H/R}{K}$ | reference                     |
|----------------------------------------------|-----------------------|-------------------------------------|-------------------------------|
| O <sub>2</sub>                               | 0.01                  | 2000.                               | see note                      |
| O <sub>3</sub>                               | 0.002                 | (default)                           | DeMore et al. (1997)*         |
| OH                                           | 0.01                  | (default)                           | Takami et al. (1998)*         |
| HO <sub>2</sub>                              | 0.5                   | (default)                           | Thornton and Abbatt (2005)    |
| H <sub>2</sub> O <sub>2</sub>                | 0.077                 | 3127.                               | Worsnop et al. (1989)         |
| H <sub>2</sub> O                             | 0.0                   | (default)                           | see note                      |
| NH <sub>3</sub>                              | 0.06                  | (default)                           | DeMore et al. (1997)*         |
| NO                                           | $5.0 \times 10^{-5}$  | (default)                           | Saastad et al. (1993)*        |
| NO <sub>2</sub>                              | 0.0015                | (default)                           | Ponche et al. (1993)*         |
| NO <sub>3</sub>                              | 0.04                  | (default)                           | Rudich et al. (1996)*         |
| N <sub>2</sub> O <sub>5</sub>                | (default)             | (default)                           | DeMore et al. (1997)*         |
| HONO                                         | 0.04                  | (default)                           | DeMore et al. (1997)*         |
| HNO <sub>3</sub>                             | 0.5                   | (default)                           | Abbatt and Waschewsky (1998)* |
| HNO <sub>4</sub>                             | (default)             | (default)                           | DeMore et al. (1997)*         |
| CH <sub>3</sub> OH                           | (default)             | (default)                           | see note                      |
| CH <sub>3</sub> O <sub>2</sub>               | 0.01                  | 2000.                               | see note                      |
| CH <sub>3</sub> OOH                          | 0.0046                | 3273.                               | Magi et al. (1997)            |
| CO <sub>2</sub>                              | 0.01                  | 2000.                               | see note                      |
| HCHO                                         | 0.04                  | (default)                           | DeMore et al. (1997)*         |
| HCOOH                                        | 0.014                 | 3978.                               | DeMore et al. (1997)          |
| CH <sub>3</sub> COOH                         | $2.0 \times 10^{-2}$  | 4079.                               | Davidovits et al. (1995)      |
| PAN                                          | (default)             | (default)                           | see note                      |
| C <sub>2</sub> H <sub>5</sub> O <sub>2</sub> | (default)             | (default)                           | see note                      |
| CH <sub>3</sub> CHO                          | $3.0 \times 10^{-2}$  | (default)                           | see note                      |
| CH <sub>3</sub> COCH <sub>3</sub>            | $3.72 \times 10^{-3}$ | 6395.                               | Davidovits et al. (1995)      |
| MGLYOX                                       | (default)             | (default)                           | see note                      |
| Cl <sub>2</sub>                              | 0.038                 | 6546.                               | Hu et al. (1995)              |
| HCl                                          | 0.074                 | 3072.                               | Schweitzer et al. (2000)*     |
| HOCl                                         | 0.5                   | (default)                           | see note                      |
| ClNO <sub>3</sub>                            | 0.108                 | (default)                           | Deiber et al. (2004)*         |
| Br <sub>2</sub>                              | 0.038                 | 6546.                               | Hu et al. (1995)              |
| HBr                                          | 0.032                 | 3940.                               | Schweitzer et al. (2000)*     |
| HOBr                                         | 0.5                   | (default)                           | Abbatt and Waschewsky (1998)* |
| BrNO <sub>3</sub>                            | 0.063                 | (default)                           | Deiber et al. (2004)*         |

Table 4: Accommodation coefficients (... continued)

| substance                         | $\alpha^\ominus$ | $\frac{-\Delta_{\text{obs}}H/R}{\text{K}}$ | reference              |
|-----------------------------------|------------------|--------------------------------------------|------------------------|
| BrCl                              | 0.038            | 6546.                                      | see note               |
| SO <sub>2</sub>                   | 0.11             | (default)                                  | DeMore et al. (1997)   |
| H <sub>2</sub> SO <sub>4</sub>    | 0.65             | (default)                                  | Pöschl et al. (1998)*  |
| CH <sub>3</sub> SO <sub>3</sub> H | 0.076            | 1762.                                      | De Bruyn et al. (1994) |
| DMS                               | (default)        | (default)                                  | see note               |
| DMSO                              | 0.048            | 2578.                                      | De Bruyn et al. (1994) |

## General notes

If no data are available, the following default values are used:

$$\alpha^\ominus = 0.1$$

$$-\Delta_{\text{obs}}H/R = 0 \text{ K}$$

The temperature dependence of the accommodation coefficients is given by (Jayne et al., 1991):

$$\frac{\alpha}{1-\alpha} = \exp\left(\frac{-\Delta_{\text{obs}}G}{RT}\right)$$

$$= \exp\left(\frac{-\Delta_{\text{obs}}H}{RT} + \frac{\Delta_{\text{obs}}S}{R}\right)$$

where  $\Delta_{\text{obs}}G$  is the Gibbs free energy barrier of the transition state toward solution (Jayne et al., 1991), and  $\Delta_{\text{obs}}H$  and  $\Delta_{\text{obs}}S$  are the corresponding enthalpy and entropy, respectively. The equation can be rearranged to:

$$\ln\left(\frac{\alpha}{1-\alpha}\right) = \frac{-\Delta_{\text{obs}}H}{R} \times \frac{1}{T} + \frac{-\Delta_{\text{obs}}S}{R}$$

and further:

$$\text{d} \ln\left(\frac{\alpha}{1-\alpha}\right) / \text{d}\left(\frac{1}{T}\right) = \frac{-\Delta_{\text{obs}}H}{R}$$

## Specific notes

O<sub>2</sub>: Estimate.

O<sub>3</sub>: Value measured at 292 K.

OH: Value measured at 293 K.

NH<sub>3</sub>: Value measured at 295 K.

NO: Value measured between 193 and 243 K.

NO<sub>2</sub>: Value measured at 298 K.

NO<sub>3</sub>: Value is a lower limit, measured at 273 K.

N<sub>2</sub>O<sub>5</sub>: Value for sulfuric acid, measured between 195 and 300 K.

HONO: Value measured between 247 and 297 K.

HNO<sub>3</sub>: Value measured at room temperature. Abbatt and Waschewsky (1998) say  $\gamma > 0.2$ . Here  $\alpha = 0.5$  is used.

HNO<sub>4</sub>: Value measured at 200 K for water ice.

CH<sub>3</sub>O<sub>2</sub>: Estimate.

CO<sub>2</sub>: Estimate.

HCHO: Value measured between 260 and 270 K.

PAN: Estimate.

C<sub>2</sub>H<sub>5</sub>O<sub>2</sub>: Estimate.

CH<sub>3</sub>CHO: Using the same estimate as in the CAPRAM 2.4 model ([http://projects.tropos.de/capram/capram\\_24.html](http://projects.tropos.de/capram/capram_24.html)).

HCl: Temperature dependence derived from published data at 2 different temperatures

HOCl: Assumed to be the same as  $\alpha(\text{HOBr})$ .

ClNO<sub>3</sub>: Value measured at 274.5 K.

HBr: Temperature dependence derived from published data at 2 different temperatures

HOBr: Value measured at room temperature. Abbatt and Waschewsky (1998) say  $\gamma > 0.2$ . Here  $\alpha = 0.5$  is used.

BrNO<sub>3</sub>: Value measured at 273 K.

BrCl: Assumed to be the same as  $\alpha(\text{Cl}_2)$ .

H<sub>2</sub>SO<sub>4</sub>: Value measured at 303 K.

Table 5: Reversible (Henry’s law) equilibria and irreversible (“heterogenous”) uptake

| # | labels | reaction | rate coefficient | reference |
|---|--------|----------|------------------|-----------|
|---|--------|----------|------------------|-----------|

## General notes

The forward (**k<sub>exf</sub>**) and backward (**k<sub>exb</sub>**) rate coefficients are calculated in the file **messy\_mecca\_aero.f90** using the accommodation coefficients in subroutine **mecca\_aero\_alpha** and Henry’s law constants in subroutine **mecca\_aero\_henry**.

For uptake of X (X = N<sub>2</sub>O<sub>5</sub>, ClNO<sub>3</sub>, or BrNO<sub>3</sub>) and

subsequent reaction with H<sub>2</sub>O, Cl<sup>−</sup>, and Br<sup>−</sup> in H3201, H6300, H6301, H6302, H7300, H7301, H7302, H7601, and H7602, we define:

$$k_{\text{exf}}(\text{X}) = \frac{k_{\text{mt}}(\text{X}) \times \text{LWC}}{[\text{H}_2\text{O}] + 5 \times 10^2 [\text{Cl}^-] + 3 \times 10^5 [\text{Br}^-]}$$

Here,  $k_{\text{mt}}$  = mass transfer coefficient, and LWC = liquid water content of the aerosol. The total uptake rate of X is only determined by  $k_{\text{mt}}$ . The factors only affect

the branching between hydrolysis and the halide reactions. The factor  $5 \times 10^2$  was chosen such that the chloride reaction dominates over hydrolysis at about  $[\text{Cl}^-] > 0.1 \text{ M}$  (see Fig. 3 in Behnke et al. (1997)), i.e. when the ratio  $[\text{H}_2\text{O}]/[\text{Cl}^-]$  is less than  $5 \times 10^2$ . The ratio  $5 \times 10^2 / 3 \times 10^5$  was chosen such that the reactions with chloride and bromide are roughly equal for sea water composition (Behnke et al., 1994).

Table 6: Heterogeneous reactions

| #      | labels     | reaction                                                                                                                            | rate coefficient                    | reference          |
|--------|------------|-------------------------------------------------------------------------------------------------------------------------------------|-------------------------------------|--------------------|
| HET200 | StHetN     | $\text{N}_2\text{O}_5 + \text{H}_2\text{O} \rightarrow 1.0 \text{ o3lossno} + \text{LossO3N} + 1. \text{ LossO3} + 2 \text{ HNO}_3$ | <code>khet_St(ihs_N205_H20)</code>  | see general notes* |
| HET201 | TrHetN     | $\text{N}_2\text{O}_5 \rightarrow 3. \text{ LossO3} + 2 \text{ NO}_3^-(\text{aq}) + 2 \text{ H}^+(\text{aq})$                       | <code>khet_Tr(iht_N205)</code>      | see general notes* |
| HET410 | StHetCl    | $\text{HOCl} + \text{HCl} \rightarrow \text{LossO3Cl} + 1. \text{ LossO3} + \text{Cl}_2 + \text{H}_2\text{O}$                       | <code>khet_St(ihs_HOCl_HCl)</code>  | see general notes* |
| HET420 | StHetNCl   | $\text{ClNO}_3 + \text{HCl} \rightarrow 1.0 \text{ o3lossno} + \text{LossO3Cl} + 1. \text{ LossO3} + \text{Cl}_2 + \text{HNO}_3$    | <code>khet_St(ihs_ClNO3_HCl)</code> | see general notes* |
| HET421 | StHetNCl   | $\text{ClNO}_3 + \text{H}_2\text{O} \rightarrow \text{HOCl} + \text{HNO}_3$                                                         | <code>khet_St(ihs_ClNO3_H20)</code> | see general notes* |
| HET422 | StHetNCl   | $\text{N}_2\text{O}_5 + \text{HCl} \rightarrow 2. \text{ LossO3} + \text{ClNO}_2 + \text{HNO}_3$                                    | <code>khet_St(ihs_N205_HCl)</code>  | see general notes* |
| HET510 | StHetBr    | $\text{HOBr} + \text{HBr} \rightarrow \text{LossO3Br} + 1. \text{ LossO3} + \text{Br}_2 + \text{H}_2\text{O}$                       | <code>khet_St(ihs_HOBr_HBr)</code>  | see general notes* |
| HET520 | StHetNBr   | $\text{BrNO}_3 + \text{H}_2\text{O} \rightarrow \text{HOBr} + \text{HNO}_3$                                                         | <code>khet_St(ihs_BrNO3_H20)</code> | see general notes* |
| HET540 | StHetNClBr | $\text{ClNO}_3 + \text{HBr} \rightarrow 1.0 \text{ o3lossno} + \text{LossO3Cl} + 1. \text{ LossO3} + \text{BrCl} + \text{HNO}_3$    | <code>khet_St(ihs_ClNO3_HBr)</code> | see general notes* |
| HET541 | StHetNClBr | $\text{BrNO}_3 + \text{HCl} \rightarrow 1.0 \text{ o3lossno} + \text{LossO3Br} + 1. \text{ LossO3} + \text{BrCl} + \text{HNO}_3$    | <code>khet_St(ihs_BrNO3_HCl)</code> | see general notes* |
| HET542 | StHetClBr  | $\text{HOCl} + \text{HBr} \rightarrow \text{LossO3Cl} + 1. \text{ LossO3} + \text{BrCl} + \text{H}_2\text{O}$                       | <code>khet_St(ihs_HOCl_HBr)</code>  | see general notes* |
| HET543 | StHetClBr  | $\text{HOBr} + \text{HCl} \rightarrow \text{LossO3Br} + 1. \text{ LossO3} + \text{BrCl} + \text{H}_2\text{O}$                       | <code>khet_St(ihs_HOBr_HCl)</code>  | see general notes* |

## General notes

Heterogeneous reaction rates are calculated with an external module (e.g., MECCA\_KHET) and then supplied to the MECCA chemistry (see [www.messy-interface.org](http://www.messy-interface.org) for details)

Table 7: Acid-base and other equilibria

| # | labels | reaction | $K_0[M^{m-n}]$ | $-\Delta H/R[K]$ | reference |
|---|--------|----------|----------------|------------------|-----------|
|---|--------|----------|----------------|------------------|-----------|

**Specific notes**

Table 8: Aqueous phase reactions

| # | labels | reaction | $k_0$ [ $M^{1-n}s^{-1}$ ] | $-E_a/R[K]$ | reference |
|---|--------|----------|---------------------------|-------------|-----------|
|---|--------|----------|---------------------------|-------------|-----------|

**Specific notes**

## References

- Abbatt, J. P. D. and Waschewsky, G. C. G.: Heterogeneous interactions of HOBr, HNO<sub>3</sub>, O<sub>3</sub>, and NO<sub>2</sub> with deliquescent NaCl aerosols at room temperature, *J. Phys. Chem. A*, 102, 3719–3725, 1998.
- Anderson, L. C. and Fahey, D. W.: Studies with ClONO<sub>2</sub>: Thermal dissociation rate and catalytic conversion to NO using an NO/O<sub>3</sub> chemiluminescence detector, *J. Phys. Chem.*, 94, 644–652, 1990.
- Aranda, A., Le Bras, G., La Verdet, G., and Poulet, G.: The BrO + CH<sub>3</sub>O<sub>2</sub> reaction: Kinetics and role in the atmospheric ozone budget, *Geophys. Res. Lett.*, 24, 2745–2748, 1997.
- Atkinson, R.: Gas-phase tropospheric chemistry of volatile organic compounds: 1. Alkanes and alkenes, *J. Phys. Chem. Ref. Data*, 26, 215–290, 1997.
- Atkinson, R.: Kinetics of the gas-phase reactions of OH radicals with alkanes and cycloalkanes, *Atmos. Chem. Phys.*, 3, 2233–2307, 2003.
- Atkinson, R., Baulch, D. L., Cox, R. A., Crowley, J. N., Hampson, R. F., Hynes, R. G., Jenkin, M. E., Rossi, M. J., and Troe, J.: Evaluated kinetic and photochemical data for atmospheric chemistry: Volume I – gas phase reactions of O<sub>x</sub>, HO<sub>x</sub>, NO<sub>x</sub> and SO<sub>x</sub> species, *Atmos. Chem. Phys.*, 4, 1461–1738, 2004.
- Atkinson, R., Baulch, D. L., Cox, R. A., Crowley, J. N., Hampson, R. F., Hynes, R. G., Jenkin, M. E., Rossi, M. J., Troe, J., and IUPAC Subcommittee: Evaluated kinetic and photochemical data for atmospheric chemistry: Volume II – gas phase reactions of organic species, *Atmos. Chem. Phys.*, 6, 3625–4055, 2006.
- Atkinson, R., Baulch, D. L., Cox, R. A., Crowley, J. N., Hampson, R. F., Hynes, R. G., Jenkin, M. E., Rossi, M. J., and Troe, J.: Evaluated kinetic and photochemical data for atmospheric chemistry: Volume III – gas phase reactions of inorganic halogens, *Atmos. Chem. Phys.*, 7, 981–1191, 2007.
- Barone, S. B., Turnipseed, A. A., and Ravishankara, A. R.: Role of adducts in the atmospheric oxidation of dimethyl sulfide, *Faraday Discuss.*, 100, 39–54, 1995.
- Bartlett, W. P. and Margerum, D. W.: Temperature dependencies of the Henry’s law constant and the aqueous phase dissociation constant of bromine chloride, *Environ. Sci. Technol.*, 33, 3410–3414, 1999.
- Bedjanian, Y., Laverdet, G., and Le Bras, G.: Low-pressure study of the reaction of Cl atoms with isoprene, *J. Phys. Chem. A*, 102, 953–959, 1998.
- Behnke, W., Scheer, V., and Zetzsch, C.: Production of BrNO<sub>2</sub>, Br<sub>2</sub> and ClNO<sub>2</sub> from the reaction between sea spray aerosol and N<sub>2</sub>O<sub>5</sub>, *J. Aerosol Sci.*, 25, S277–S278, 1994.
- Behnke, W., George, C., Scheer, V., and Zetzsch, C.: Production and decay of ClNO<sub>2</sub> from the reaction of gaseous N<sub>2</sub>O<sub>5</sub> with NaCl solution: Bulk and aerosol experiments, *J. Geophys. Res.*, 102D, 3795–3804, 1997.
- Betterton, E. A. and Hoffmann, M. R.: Henry’s law constants of some environmentally important aldehydes, *Environ. Sci. Technol.*, 22, 1415–1418, 1988.
- Boyd, A. A., Flaud, P.-M., Daugey, N., and Lesclaux, R.: Rate constants for RO<sub>2</sub> + HO<sub>2</sub> reactions measured under a large excess of HO<sub>2</sub>, *J. Phys. Chem. A*, 107, 818–821, 2003.
- Brimblecombe, P. and Clegg, S. L.: Erratum, *J. Atmos. Chem.*, 8, 95, 1989.
- Canosa-Mas, C. E., King, M. D., Lopez, R., Percival, C. J., Wayne, R. P., Shallcross, D. E., Pyle, J. A., and Daele, V.: Is the reaction between CH<sub>3</sub>(O)O<sub>2</sub> and NO<sub>3</sub> important in the night-time troposphere?, *J. Chem. Soc. Faraday Trans.*, 92, 2211–2222, 1996.
- Chameides, W. L.: The photochemistry of a remote marine stratiform cloud, *J. Geophys. Res.*, 89D, 4739–4755, 1984.
- Christensen, L. E., Okumura, M., Sander, S. P., Salawitch, R. J., Toon, G. C., Sen, B., Blavier, J.-F., and Jucks, K. W.: Kinetics of HO<sub>2</sub> + HO<sub>2</sub> → H<sub>2</sub>O<sub>2</sub> + O<sub>2</sub>: Implications for stratospheric H<sub>2</sub>O<sub>2</sub>, *Geophys. Res. Lett.*, 29, doi:10.1029/2001GL014525, 2002.
- Clyne, M. A. A. and Cruse, H. W.: Atomic resonance fluorescence spectrometry for the rate constants of rapid bimolecular reactions. Part 2. Reactions Cl + BrCl, Cl + Br<sub>2</sub>, Cl + ICl, Br + IBr, Br + ICl, J. Chem. Soc. Faraday Trans. 2, 68, 1377–1387, 1972.
- Davidovits, P., Hu, J. H., Worsnop, D. R., Zahniser, M. S., and Kolb, C. E.: Entry of gas molecules into liquids, *Faraday Discuss.*, 100, 65–81, 1995.
- Davis, Jr., W. and de Bruin, H. J.: New activity coefficients of 0–100 per cent aqueous nitric acid, *J. Inorg. Nucl. Chem.*, 26, 1069–1083, 1964.
- De Bruyn, W. J., Shorter, J. A., Davidovits, P., Worsnop, D. R., Zahniser, M. S., and Kolb, C. E.: Uptake of gas-phase sulfur species methanesulfonic acid, dimethylsulfoxide, and dimethyl sulfone by aqueous surfaces, *J. Geophys. Res.*, 99D, 16 927–16 932, 1994.
- Deiber, G., George, C., Le Calvé, S., Schweitzer, F., and Mirabel, P.: Uptake study of ClONO<sub>2</sub> and BrONO<sub>2</sub> by halide containing droplets, *Atmos. Chem. Phys.*, 4, 1291–1299, 2004.

- DeMore, W. B., Sander, S. P., Golden, D. M., Hampson, R. F., Kurylo, M. J., Howard, C. J., Ravishankara, A. R., Kolb, C. E., and Molina, M. J.: Chemical kinetics and photochemical data for use in stratospheric modeling. Evaluation number 12, JPL Publication 97-4, Jet Propulsion Laboratory, Pasadena, CA, 1997.
- Dillon, T. J., Horowitz, A., Hölscher, D., Crowley, J. N., Vereecken, L., and Peeters, J.: Reaction of HO with hydroxyacetone ( $\text{HOCH}_2\text{C}(\text{O})\text{CH}_3$ ): rate coefficients (233–363 K) and mechanism, *Phys. Chem. Chem. Phys.*, 8, 236–246, 2006.
- Dolson, D. A. and Leone, S. R.: A reinvestigation of the laser-initiated chlorine/hydrogen bromide chain reaction: absolute rate constants and the  $v = 2/v = 1$  ratio from chlorine atom + hydrogen bromide  $\rightarrow$  hydrogen chloride( $v$ ) + bromine atom, *J. Phys. Chem.*, 91, 3543–3550, 1987.
- Finkbeiner, M., Crowley, J. N., Horie, O., Müller, R., Moortgat, G. K., and Crutzen, P. J.: Reaction between  $\text{HO}_2$  and  $\text{ClO}$ : Product formation between 210 and 300 K, *J. Phys. Chem.*, 99, 16 264–16 275, 1995.
- Hanson, D. R., Burkholder, J. B., Howard, C. J., and Ravishankara, A. R.: Measurement of OH and  $\text{HO}_2$  radical uptake coefficients on water and sulfuric acid surfaces, *J. Phys. Chem.*, 96, 4979–4985, 1992.
- Hu, J. H., Shi, Q., Davidovits, P., Worsnop, D. R., Zahniser, M. S., and Kolb, C. E.: Reactive uptake of  $\text{Cl}_2(\text{g})$  and  $\text{Br}_2(\text{g})$  by aqueous surfaces as a function of  $\text{Br}^-$  and  $\text{I}^-$  ion concentration: The effect of chemical reaction at the interface, *J. Phys. Chem.*, 99, 8768–8776, 1995.
- Huthwelker, T., Clegg, S. L., Peter, T., Carslaw, K., Luo, B. P., and Brimblecombe, P.: Solubility of  $\text{HOCl}$  in water and aqueous  $\text{H}_2\text{SO}_4$  to stratospheric temperatures, *J. Atmos. Chem.*, 21, 81–95, 1995.
- Hynes, A. J. and Wine, P. H.: The atmospheric chemistry of dimethylsulfoxide (DMSO) kinetics and mechanism of the OH + DMSO reaction, *J. Atmos. Chem.*, 24, 23–37, 1996.
- Ingham, T., Bauer, D., Sander, R., Crutzen, P. J., and Crowley, J. N.: Kinetics and products of the reactions  $\text{BrO} + \text{DMS}$  and  $\text{Br} + \text{DMS}$  at 298 K, *J. Phys. Chem. A*, 103, 7199–7209, 1999.
- Jacob, D. J.: Chemistry of OH in remote clouds and its role in the production of formic acid and peroxy-monosulfate, *J. Geophys. Res.*, 91D, 9807–9826, 1986.
- Jayne, J. T., Duan, S. X., Davidovits, P., Worsnop, D. R., Zahniser, M. S., and Kolb, C. E.: Uptake of gas-phase alcohol and organic acid molecules by water surfaces, *J. Phys. Chem.*, 95, 6329–6336, 1991.
- Jefferson, A., Nicovich, J. M., and Wine, P. H.: Temperature-dependent kinetics studies of the reactions  $\text{Br}(^2\text{P}_{3/2}) + \text{CH}_3\text{SCH}_3 \leftrightarrow \text{CH}_3\text{SCH}_2 + \text{HBr}$ . Heat of formation of the  $\text{CH}_3\text{SCH}_2$  radical, *J. Phys. Chem.*, 98, 7128–7135, 1994.
- Kircher, C. C. and Sander, S. P.: Kinetics and mechanism of  $\text{HO}_2$  and  $\text{DO}_2$  disproportionations, *J. Phys. Chem.*, 88, 2082–2091, 1984.
- Kirchner, F. and Stockwell, W. R.: Effect of peroxy radical reactions on the predicted concentrations of ozone, nitrogenous compounds, and radicals, *J. Geophys. Res.*, 101D, 21 007–21 022, 1996.
- Kohlmann, J.-P. and Poppe, D.: The tropospheric gas-phase degradation of  $\text{NH}_3$  and its impact on the formation of  $\text{N}_2\text{O}$  and  $\text{NO}_x$ , *J. Atmos. Chem.*, 32, 397–415, 1999.
- Kondo, O. and Benson, S. W.: Kinetics and equilibria in the system  $\text{Br} + \text{CH}_3\text{OOH} \rightleftharpoons \text{HBr} + \text{CH}_3\text{OO}$ . An upper limit for the heat of formation of the methylperoxy radical, *J. Phys. Chem.*, 88, 6675–6680, 1984.
- Lax, E.: Taschenbuch für Chemiker und Physiker, Springer Verlag, Berlin, 1969.
- Lee, Y.-N. and Schwartz, S. E.: Reaction kinetics of nitrogen dioxide with liquid water at low partial pressure, *J. Phys. Chem.*, 85, 840–848, 1981.
- Lind, J. A. and Kok, G. L.: Correction to “Henry’s law determinations for aqueous solutions of hydrogen peroxide, methylhydroperoxide, and peroxyacetic acid” by John A. Lind and Gregory L. Kok, *J. Geophys. Res.*, 99D, 21 119, 1994.
- Magi, L., Schweitzer, F., Pallares, C., Cherif, S., Mirabel, P., and George, C.: Investigation of the uptake rate of ozone and methyl hydroperoxide by water surfaces, *J. Phys. Chem. A*, 101, 4943–4949, 1997.
- Manion, J. A., Huie, R. E., Levin, R. D., Burgess, Jr., D. R., Orkin, V. L., Tsang, W., McGivern, W. S., Hudgens, J. W., Knyazev, V. D., Atkinson, D. B., Chai, E., Tereza, A. M., Lin, C.-Y., Allison, T. C., Mallard, W. G., Westley, F., Herron, J. T., Hampson, R. F., and Frizzell, D. H.: NIST Chemical Kinetics Database (Web Version), <http://kinetics.nist.gov>, 2010.
- McCabe, D. C., Gierczak, T., Talukdar, R. K., and Ravishankara, A. R.: Kinetics of the reaction  $\text{OH} + \text{CO}$  under atmospheric conditions, *Geophys. Res. Lett.*, 28, 3135–3138, 2001.
- Müller, J.-F. and Brasseur, G.: IMAGES: A three-dimensional chemical transport model of the global troposphere, *J. Geophys. Res.*, 100D, 16 445–16 490, 1995.

- Orlando, J. J. and Tyndall, G. S.: Rate coefficients for the thermal decomposition of  $\text{BrONO}_2$  and the heat of formation of  $\text{BrONO}_2$ , *J. Phys. Chem.*, 100, 19 398–19 405, 1996.
- Orlando, J. J., Tyndall, G. S., Bertman, S. B., Chen, W., and Burkholder, J. B.: Rate coefficient for the reaction of OH with  $\text{CH}_2=\text{C}(\text{CH}_3)\text{C}(\text{O})\text{OONO}_2$  (MPAN), *Atmos. Environ.*, 36, 1895–1900, 2002.
- Ponche, J. L., George, C., and Mirabel, P.: Mass transfer at the air/water interface: Mass accommodation coefficients of  $\text{SO}_2$ ,  $\text{HNO}_3$ ,  $\text{NO}_2$  and  $\text{NH}_3$ , *J. Atmos. Chem.*, 16, 1–21, 1993.
- Pöschl, U., Canagaratna, M., Jayne, J. T., Molina, L. T., Worsnop, D. R., Kolb, C. E., and Molina, M. J.: Mass accommodation coefficient of  $\text{H}_2\text{SO}_4$  vapor on aqueous sulfuric acid surfaces and gaseous diffusion coefficient of  $\text{H}_2\text{SO}_4$  in  $\text{N}_2/\text{H}_2\text{O}$ , *J. Phys. Chem. A*, 102, 10 082–10 089, 1998.
- Pöschl, U., von Kuhlmann, R., Poisson, N., and Crutzen, P. J.: Development and intercomparison of condensed isoprene oxidation mechanisms for global atmospheric modeling, *J. Atmos. Chem.*, 37, 29–52, 2000.
- Régimbal, J.-M. and Mozurkewich, M.: Peroxynitric acid decay mechanisms and kinetics at low pH, *J. Phys. Chem. A*, 101, 8822–8829, 1997.
- Rickard, A. and Pascoe, S.: The Master Chemical Mechanism (MCM), <http://mcm.leeds.ac.uk>, 2009.
- Roelofs, G.-J. and Lelieveld, J.: Model study of the influence of cross-tropopause  $\text{O}_3$  transports of tropospheric  $\text{O}_3$  levels, *Tellus*, 49B, 38–55, 1997.
- Rudich, Y., Talukdar, R. K., Imamura, T., Fox, R. W., and Ravishankara, A. R.: Uptake of  $\text{NO}_3$  on KI solutions: Rate coefficient for the  $\text{NO}_3 + \text{I}^-$  reaction and gas-phase diffusion coefficients for  $\text{NO}_3$ , *Chem. Phys. Lett.*, 261, 467–473, 1996.
- Saastad, O. W., Ellermann, T., and Nielsen, C. J.: On the adsorption of NO and  $\text{NO}_2$  on cold  $\text{H}_2\text{O}/\text{H}_2\text{SO}_4$  surfaces, *Geophys. Res. Lett.*, 20, 1191–1193, 1993.
- Sander, R., Jöckel, P., Kirner, O., Kunert, A. T., Landgraf, J., and Pozzer, A.: The photolysis module JVAL-14, compatible with the MESSy standard, and the JVal PreProcessor (JVPP), *Geosci. Model Dev.*, 7, 2653–2662, <http://www.geosci-model-dev.net/7/2653>, 2014.
- Sander, S. P., Friedl, R. R., Golden, D. M., Kurylo, M. J., Moortgat, G. K., Keller-Rudek, H., Wine, P. H., Ravishankara, A. R., Kolb, C. E., Molina, M. J., Finlayson-Pitts, B. J., Huie, R. E., and Orkin, V. L.: Chemical Kinetics and Photochemical Data for Use in Atmospheric Studies, Evaluation Number 15, JPL Publication 06-2, Jet Propulsion Laboratory, Pasadena, CA, <http://jpldataeval.jpl.nasa.gov>, 2006.
- Sander, S. P., Abbatt, J., Barker, J. R., Burkholder, J. B., Friedl, R. R., Golden, D. M., Huie, R. E., Kolb, C. E., Kurylo, M. J., Moortgat, G. K., Orkin, V. L., and Wine, P. H.: Chemical Kinetics and Photochemical Data for Use in Atmospheric Studies, Evaluation No. 17, JPL Publication 10-6, Jet Propulsion Laboratory, Pasadena, <http://jpldataeval.jpl.nasa.gov>, 2011.
- Schwartz, S. E. and White, W. H.: Solubility equilibria of the nitrogen oxides and oxyacids in dilute aqueous solution, in: *Advances in Environmental Science and Engineering*, edited by Pfafflin, J. R. and Ziegler, E. N., vol. 4, pp. 1–45, Gordon and Breach Science Publishers, NY, 1981.
- Schweitzer, F., Mirabel, P., and George, C.: Uptake of hydrogen halides by water droplets, *J. Phys. Chem. A*, 104, 72–76, 2000.
- Sivakumaran, V., Hölscher, D., Dillon, T. J., and Crowley, J. N.: Reaction between OH and HCHO: temperature dependent rate coefficients (202–399 K) and product pathways (298 K), *Phys. Chem. Chem. Phys.*, 5, 4821–4827, 2003.
- Snider, J. R. and Dawson, G. A.: Tropospheric light alcohols, carbonyls, and acetonitrile: Concentrations in the southwestern United States and Henry’s law data, *J. Geophys. Res.*, 90D, 3797–3805, 1985.
- Staudinger, J. and Roberts, P. V.: A critical compilation of Henry’s law constant temperature dependence relations for organic compounds in dilute aqueous solutions, *Chemosphere*, 44, 561–576, 2001.
- T. J. Wallington et al.: IUPAC Task group on atmospheric chemical kinetic data evaluation: Evaluated kinetic data, <http://iupac.pole-ether.fr>, 2014.
- Takami, A., Kato, S., Shimono, A., and Koda, S.: Uptake coefficient of OH radical on aqueous surface, *Chem. Phys.*, 231, 215–227, 1998.
- Thomas, K., Volz-Thomas, A., and Kley, D.: Zur Wechselwirkung von  $\text{NO}_3$ -Radikalen mit wässrigen Lösungen: Bestimmung des Henry- und des Massennakkomodationskoeffizienten, Ph.D. thesis, Institut für Chemie und Dynamik der Geosphäre 2, Forschungszentrum Jülich GmbH, Germany, 1993.
- Thornton, J. and Abbatt, J. P. D.: Measurements of  $\text{HO}_2$  uptake to aqueous aerosol: Mass accommodation coefficients and net reactive loss, *J. Geophys. Res.*, 110D, doi:10.1029/2004JD005402, 2005.

- Tyndall, G. S., Staffelbach, T. A., Orlando, J. J., and Calvert, J. G.: Rate coefficients for the reactions of OH radicals with methylglyoxal and acetaldehyde, *Int. J. Chem. Kinetics*, 27, 1009–1020, 1995.
- Tyndall, G. S., Cox, R. A., Granier, C., Lesclaux, R., Moortgat, G. K., Pilling, M. J., Ravishankara, A. R., and Wallington, T. J.: The atmospheric chemistry of small organic peroxy radicals, *J. Geophys. Res.*, 106D, 12 157–12 182, 2001.
- Vogt, R., Crutzen, P. J., and Sander, R.: A mechanism for halogen release from sea-salt aerosol in the remote marine boundary layer, *Nature*, 383, 327–330, doi:10.1038/383327A0, 1996.
- von Kuhlmann, R.: Tropospheric photochemistry of ozone, its precursors and the hydroxyl radical: A 3D-modeling study considering non-methane hydrocarbons, Ph.D. thesis, Johannes Gutenberg-Universität, Mainz, Germany, 2001.
- von Kuhlmann, R., Lawrence, M. G., Crutzen, P. J., and Rasch, P. J.: A model for studies of tropospheric ozone and nonmethane hydrocarbons: Model description and ozone results, *J. Geophys. Res.*, 108D, 4294, doi:10.1029/2002JD002893, 2003.
- Wallington, T. J., Ammann, M., Cox, R. A., Crowley, J. N., Jenkin, M. E., Mellouki, A., Rossi, M. J., Troe, J., and Cox, B.: IUPAC task group on atmospheric chemical kinetic data evaluation, <http://iupac.pole-ether.fr>.
- Wilhelm, E., Battino, R., and Wilcock, R. J.: Low-pressure solubility of gases in liquid water, *Chem. Rev.*, 77, 219–262, 1977.
- Worsnop, D. R., Zahniser, M. S., Kolb, C. E., Gardner, J. A., Watson, L. R., van Doren, J. M., Jayne, J. T., and Davidovits, P.: The temperature dependence of mass accommodation of SO<sub>2</sub> and H<sub>2</sub>O<sub>2</sub> on aqueous surfaces, *J. Phys. Chem.*, 93, 1159–1172, 1989.
- Yin, F., Grosjean, D., and Seinfeld, J. H.: Photooxidation of dimethyl sulfide and dimethyl disulfide. I: Mechanism development, *J. Atmos. Chem.*, 11, 309–364, 1990.
